# Supplementary material for: Mono or double Pd-catalyzed C–H bond functionalization for the annulative π-extension of 1,8-dibromonaphthalene: a one pot access to fluoranthene derivatives
Source: publisher site journal article supplement (doi:10.3762/bjoc.20.37), 2024-02-23

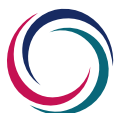

## Supporting Information

for

### **Mono or double Pd-catalyzed C–H bond functionalization for the annulative $\pi$ -extension of 1,8-dibromonaphthalene: a one pot access to fluoranthene derivatives**

Nahed Ketata, Linhao Liu, Ridha Ben Salem and Henri Doucet

*Beilstein J. Org. Chem.* **2024**, *20*, 427–435. [doi:10.3762/bjoc.20.37](https://doi.org/10.3762/bjoc.20.37)

### **Copies of $^1\text{H}$ , $^{19}\text{F}$ , and $^{13}\text{C}$ NMR spectra**

# 7,8,9,10-Tetrafluorofluoranthene (1)

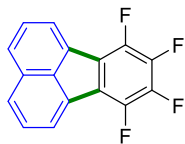

## $^1\text{H}$ NMR (500 MHz, $\text{CDCl}_3$ )

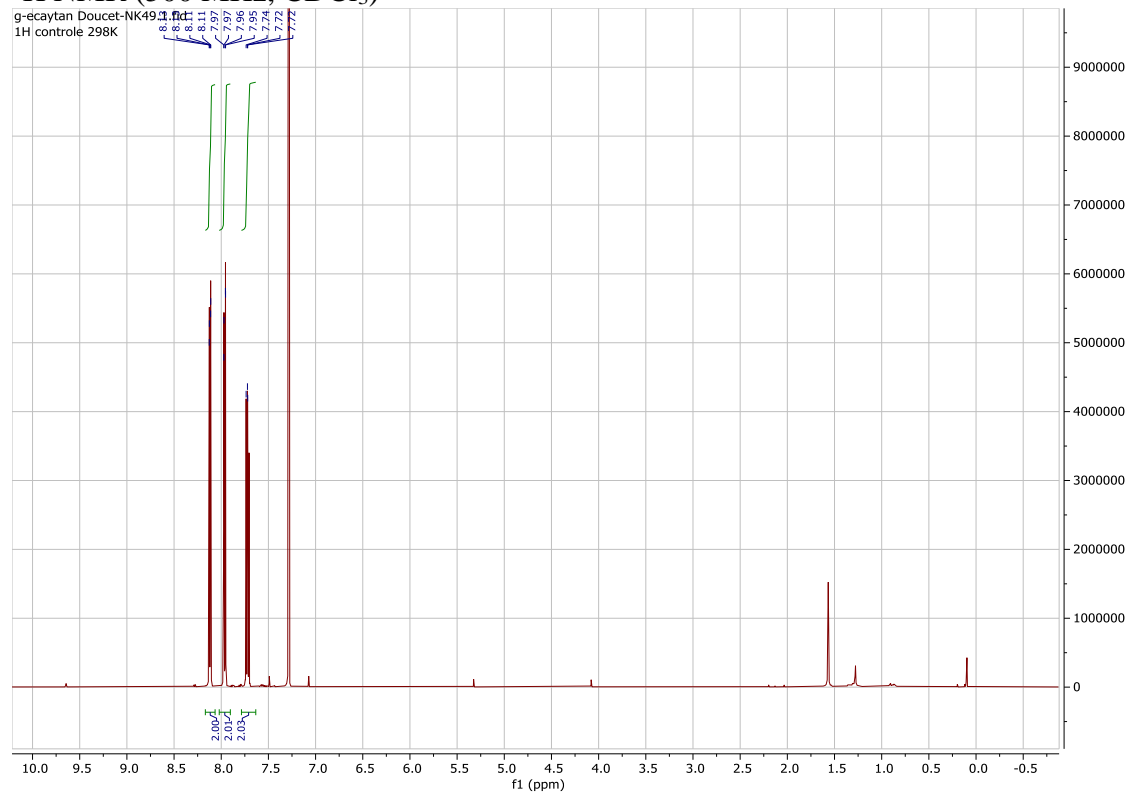

## $^{19}\text{F}$ NMR (376 MHz, $\text{CDCl}_3$ )

nketata nk49f

-143.72  
-157.14

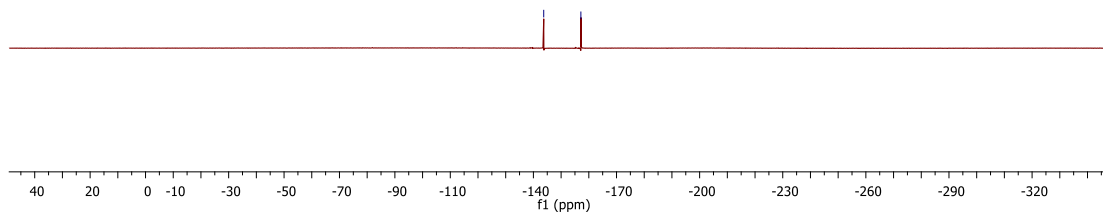

# <sup>13</sup>C NMR (125 MHz, CDCl<sub>3</sub>)

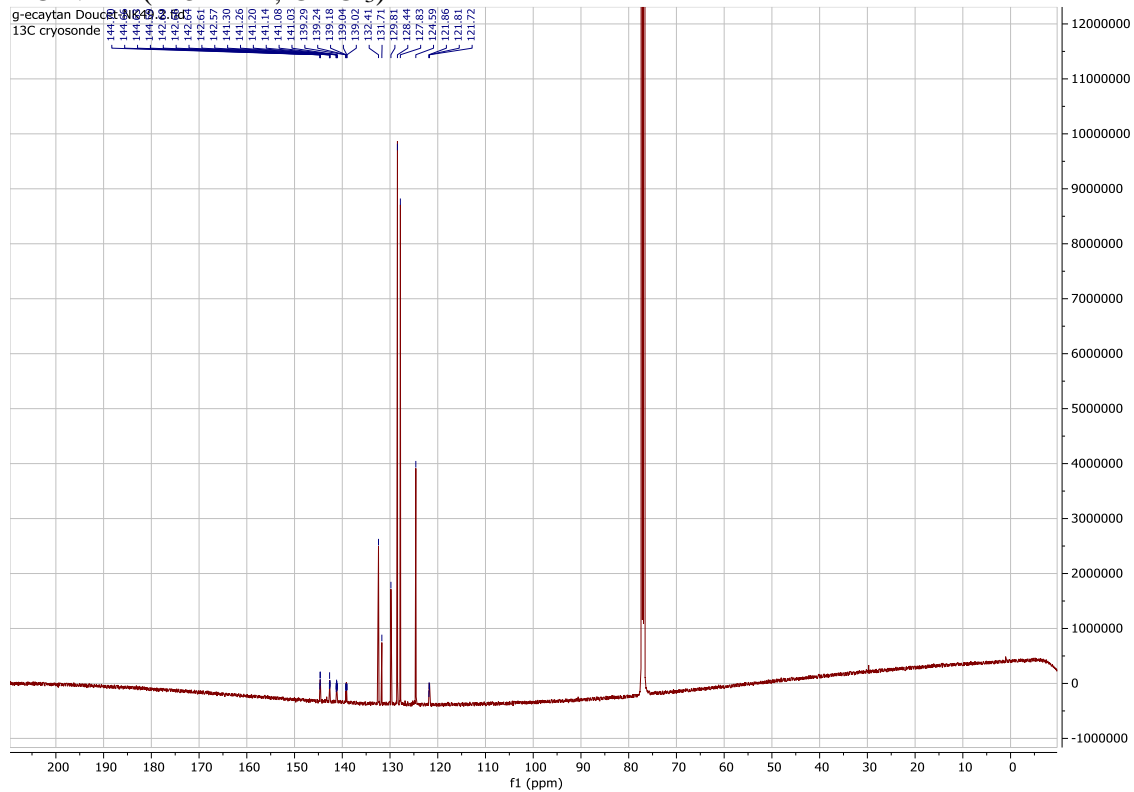

<sup>13</sup>C{<sup>1</sup>H}

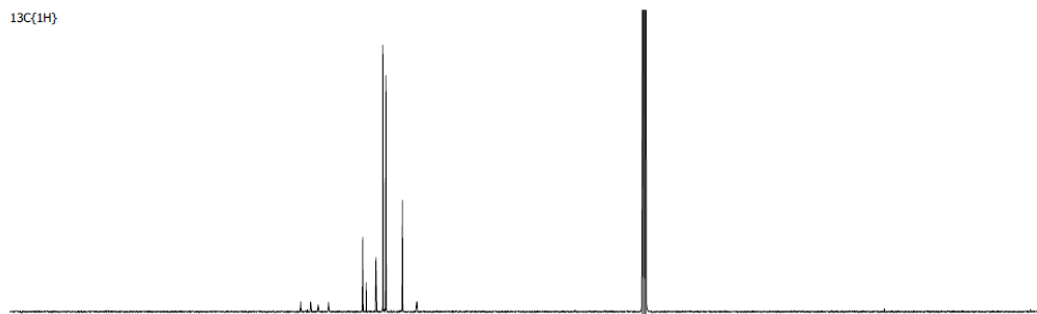

<sup>13</sup>C{<sup>19</sup>F}

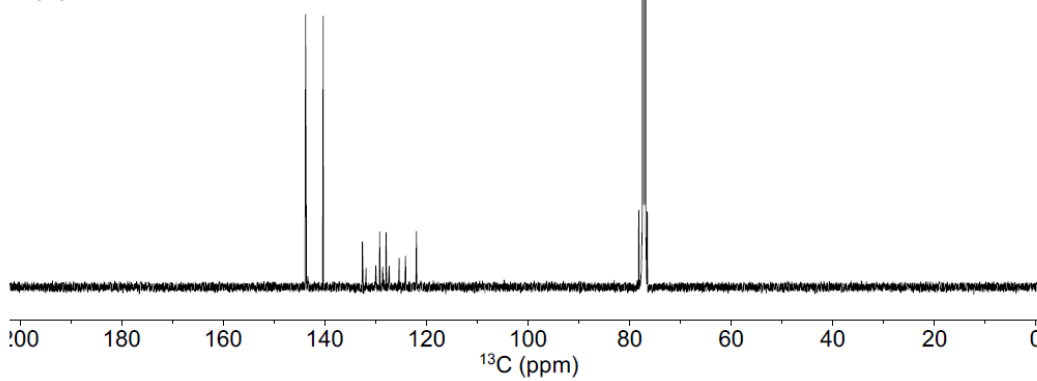

## 7,10-Difluorofluoranthene (2)

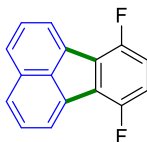

### $^1\text{H}$ NMR (400 MHz, $\text{CDCl}_3$ )

nketata nk73ft

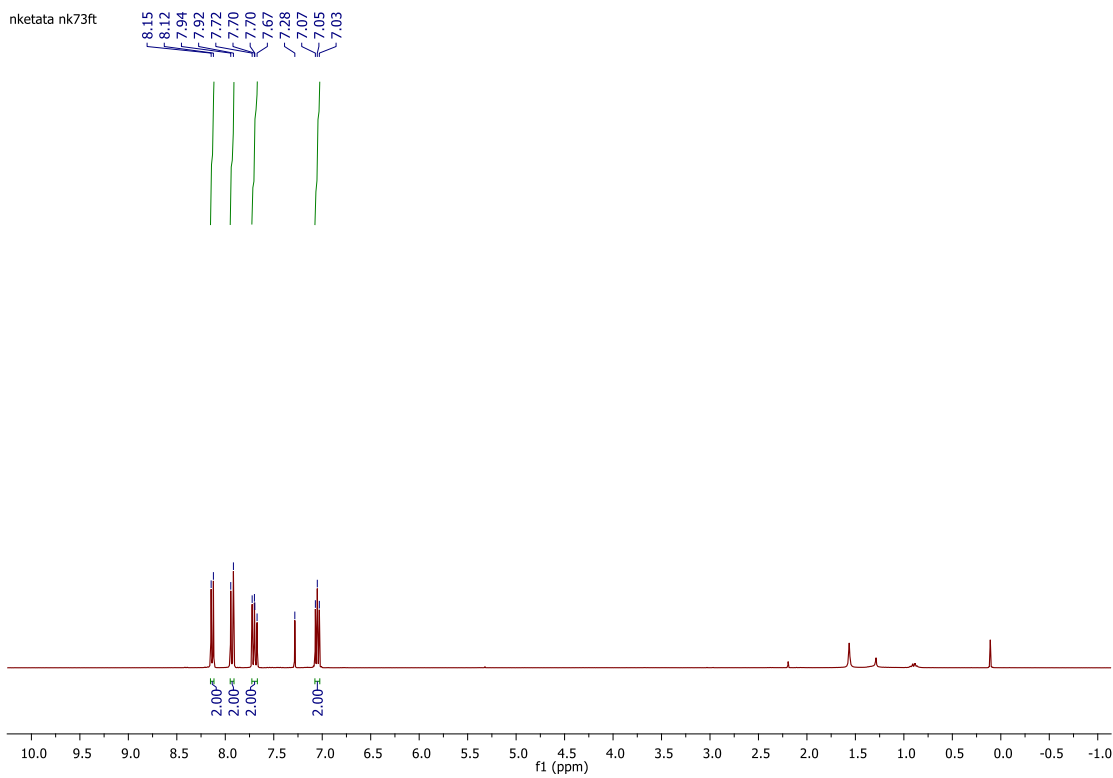

### $^{19}\text{F}$ NMR (376 MHz, $\text{CDCl}_3$ )

nketata nk73ft

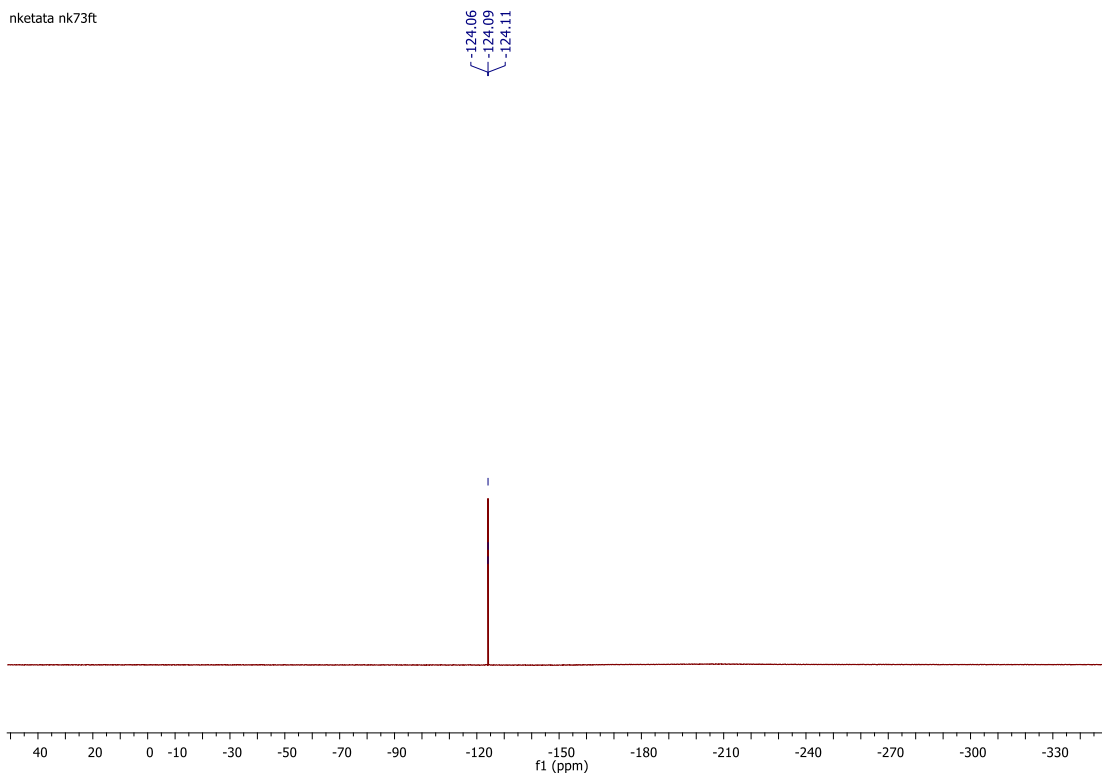

<sup>13</sup>C NMR (100 MHz, CDCl<sub>3</sub>)

nketata nk73ft

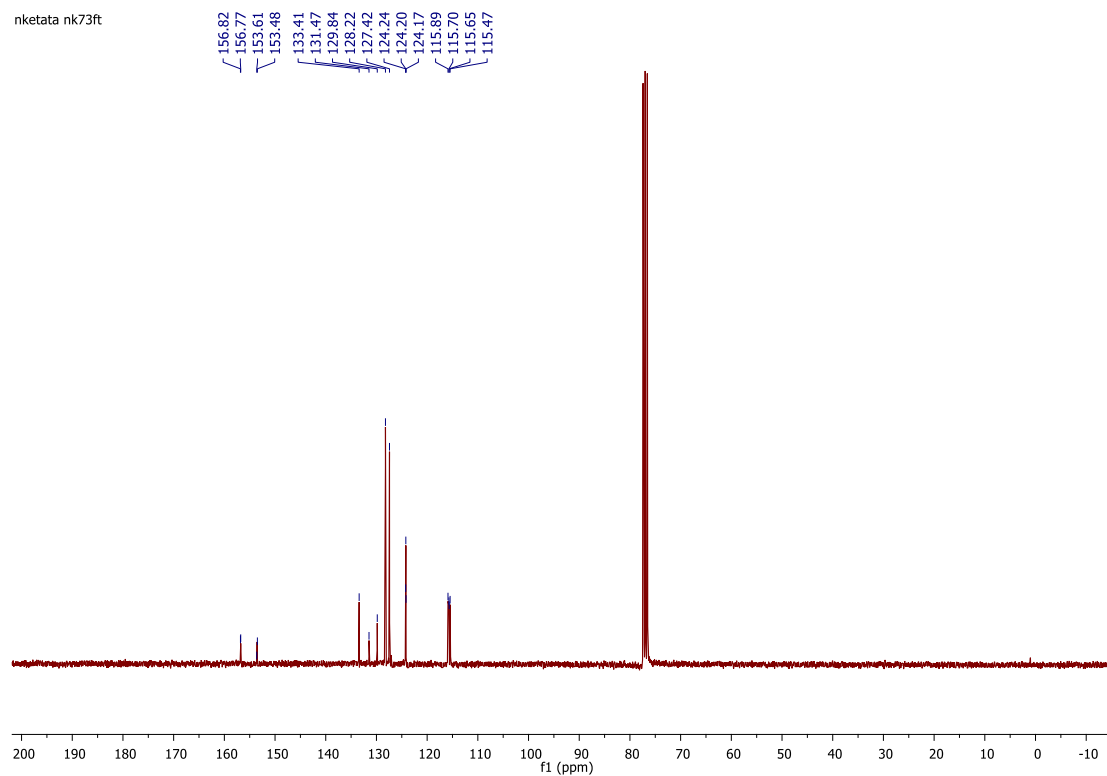

### 7-Fluoro-10-methoxyfluoranthene (3)

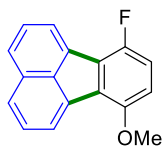

### <sup>1</sup>H NMR (400MHz, CDCl<sub>3</sub>)

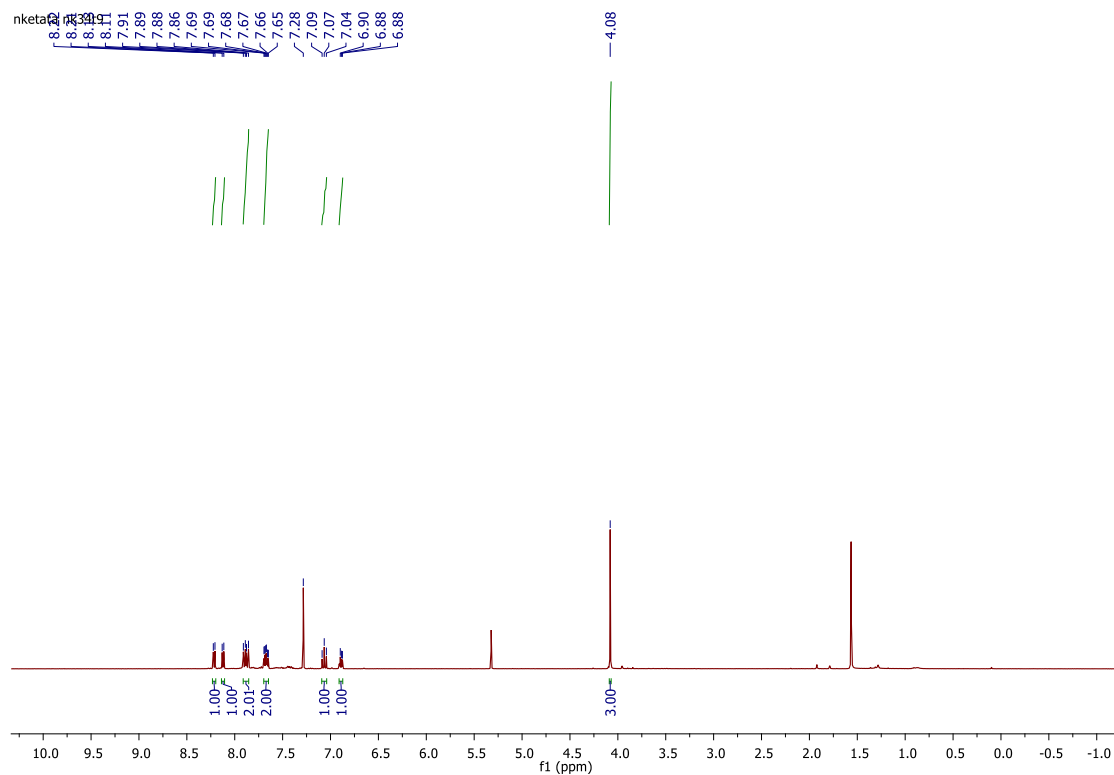

### <sup>19</sup>F NMR (376 MHz, CDCl<sub>3</sub>)

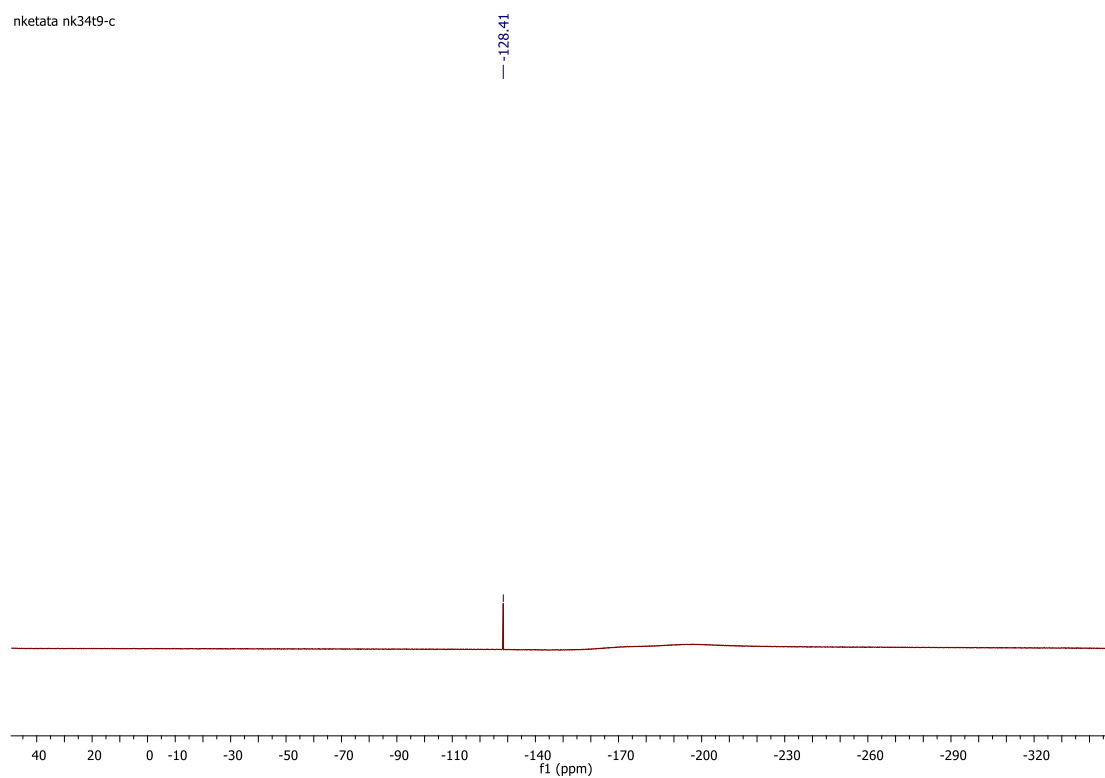

<sup>13</sup>C NMR (100 MHz, CDCl<sub>3</sub>)

nketata nk34t9--c

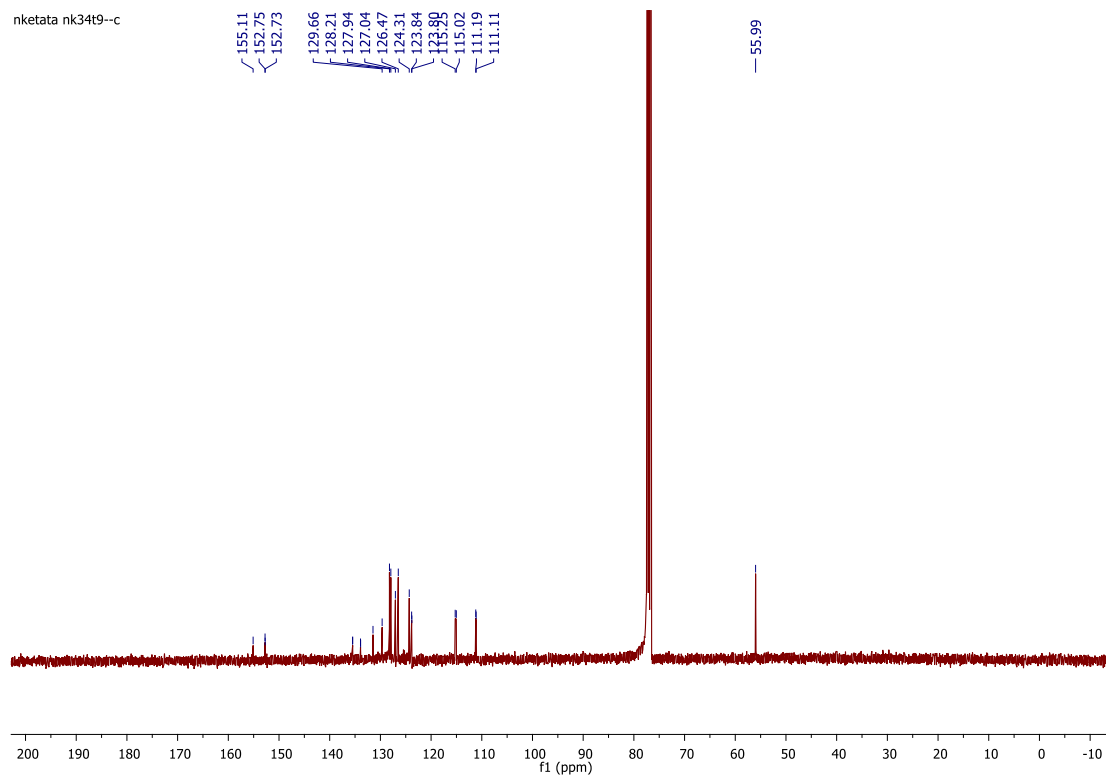

### 7-Fluoro-10-methylfluoranthene (4)

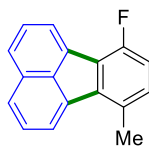

$^1\text{H NMR}$  (400MHz,  $\text{CDCl}_3$ )



$^{19}\text{F NMR}$  (376 MHz,  $\text{CDCl}_3$ )

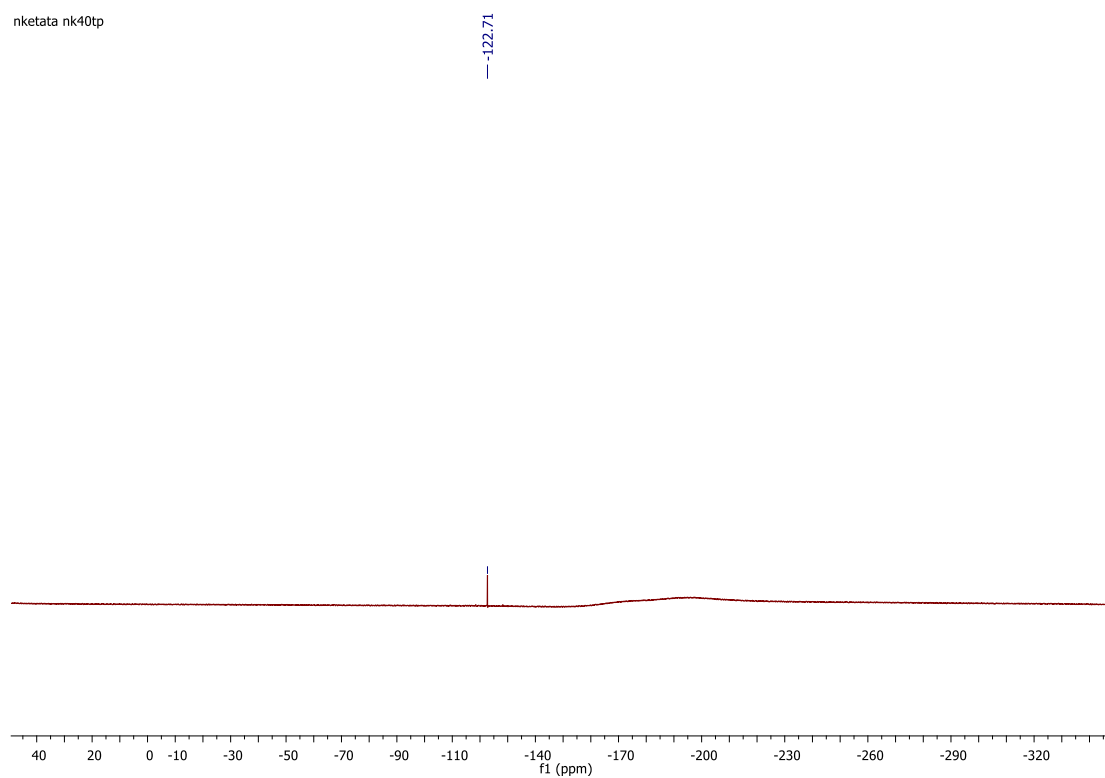



$^{13}\text{C}$  NMR (100 MHz,  $\text{CDCl}_3$ )

nketata nk40tp

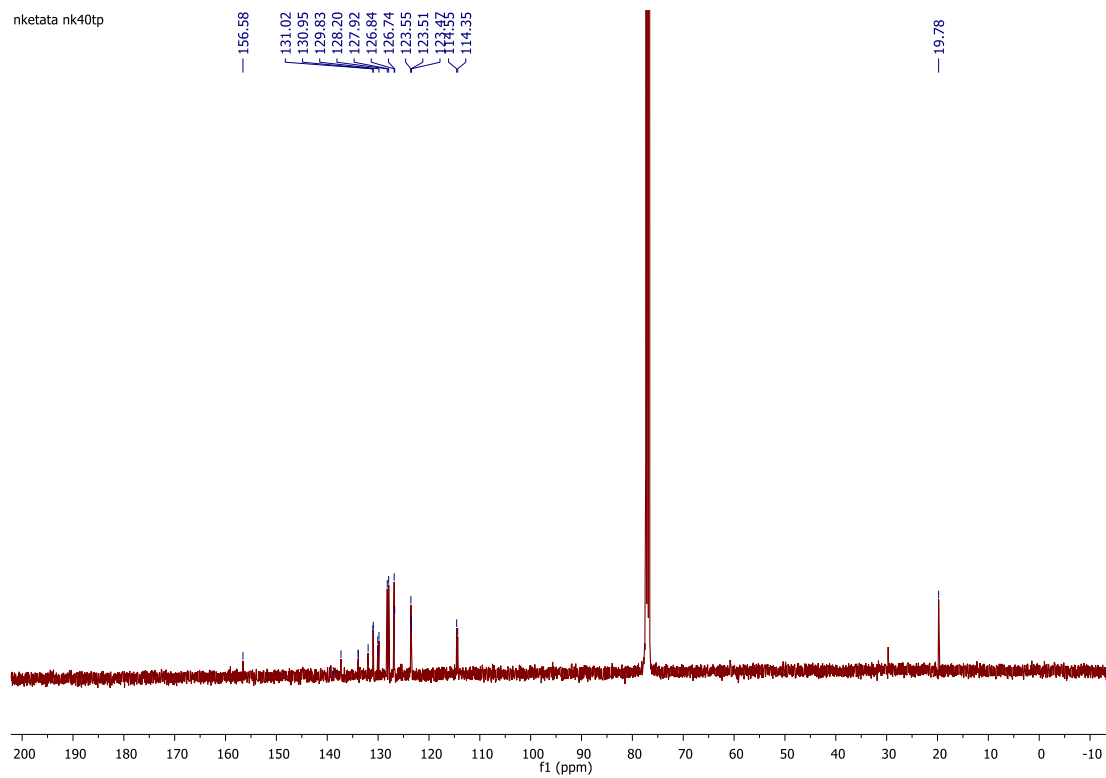

# 7-Chloro-10-fluorofluoranthene (5)

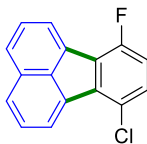

## <sup>1</sup>H NMR (400MHz, CDCl<sub>3</sub>)

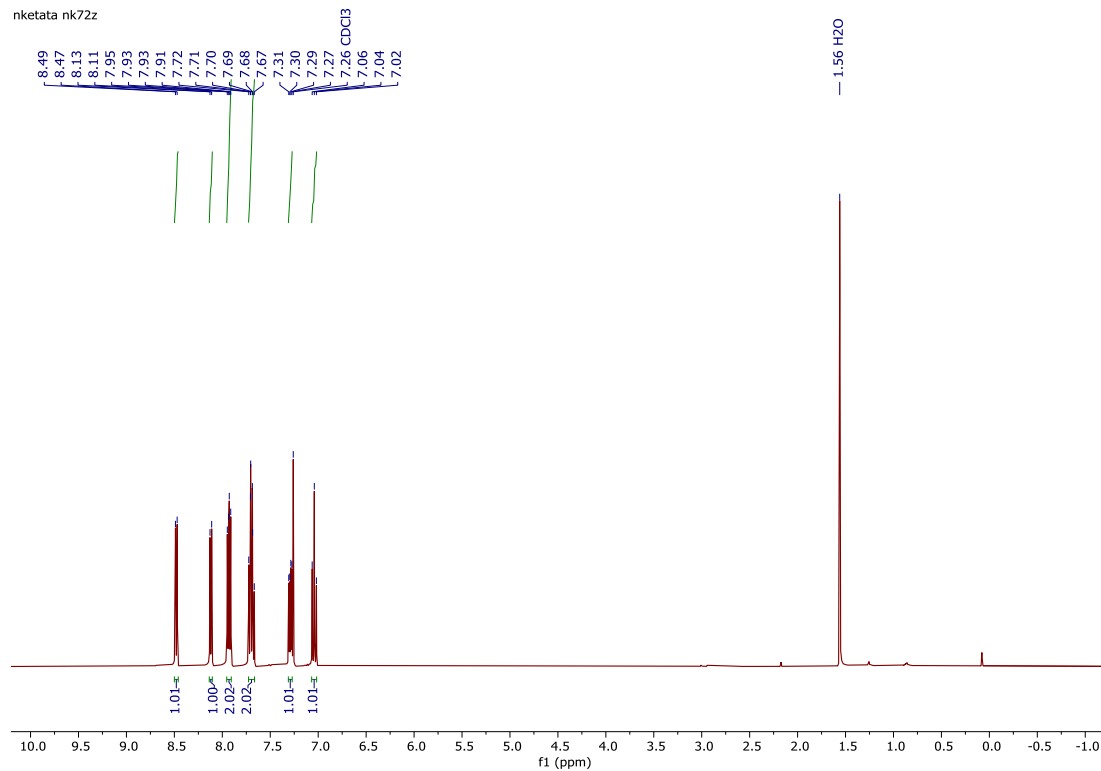

## <sup>19</sup>F NMR (376 MHz, CDCl<sub>3</sub>)

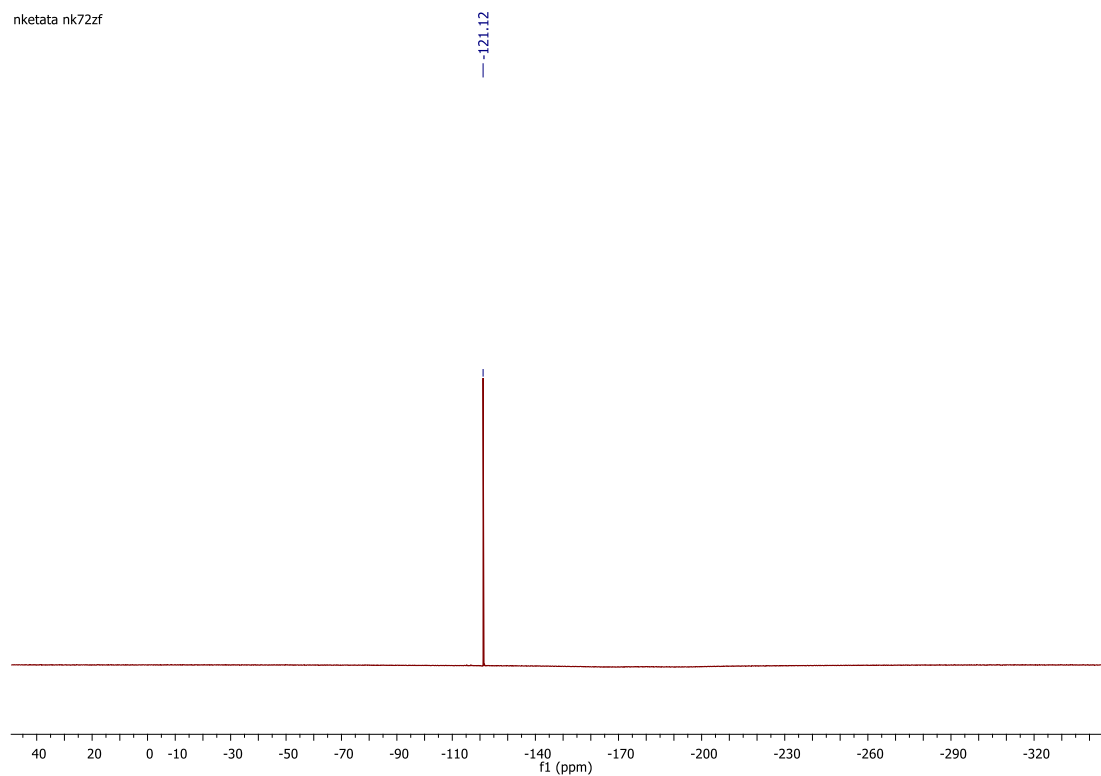

$^{13}\text{C}$  NMR (100 MHz,  $\text{CDCl}_3$ )

nketata nk72zf

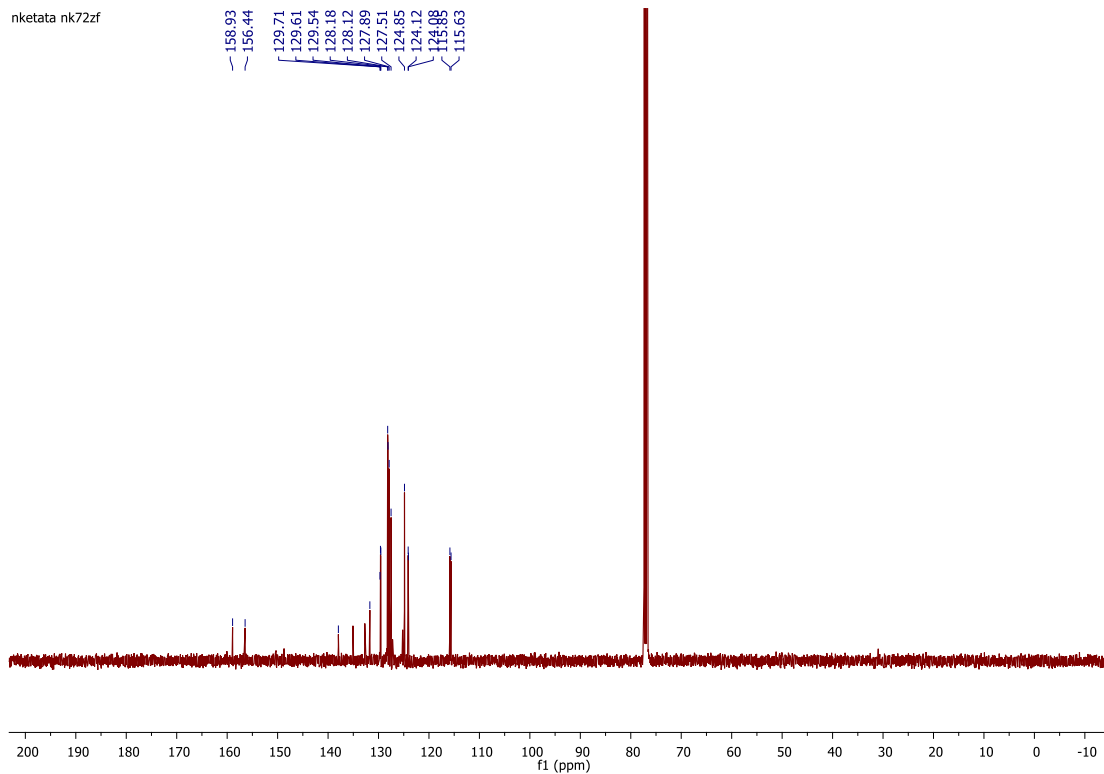

# Cyclopropyl(10-fluorofluoranthren-7-yl)methanone (6)

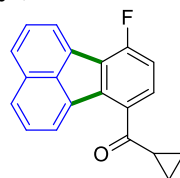

$^1\text{H NMR}$  (400MHz,  $\text{CDCl}_3$ )

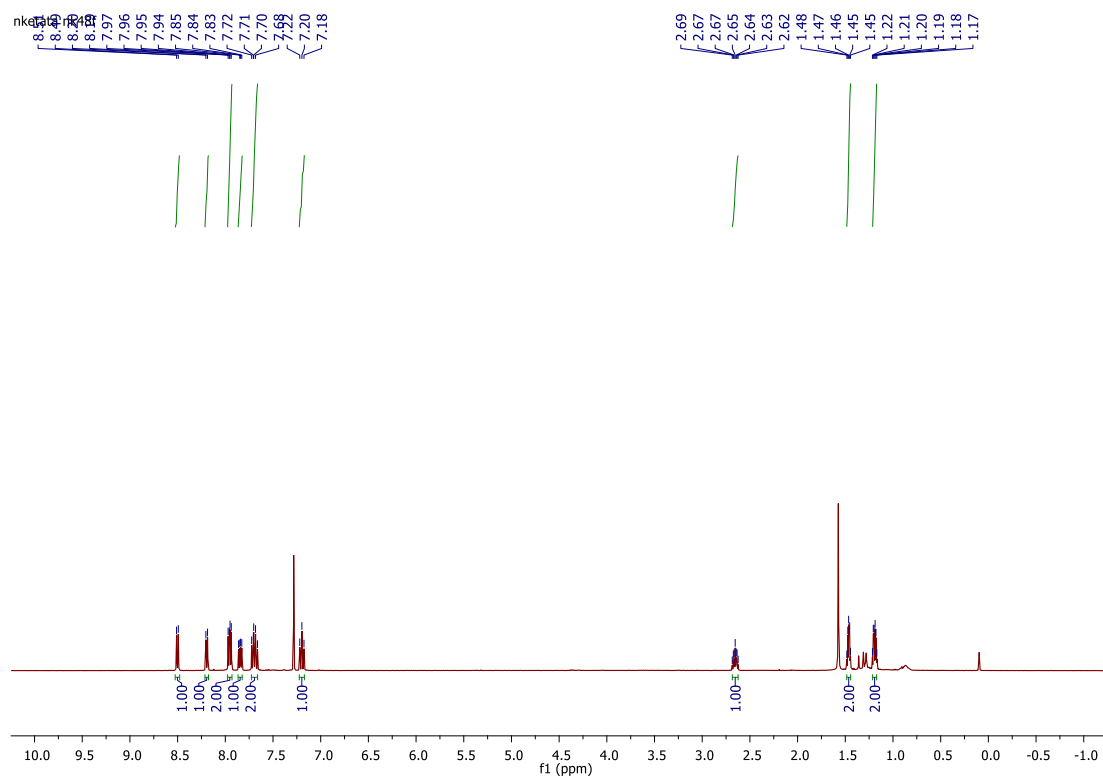

$^{19}\text{F NMR}$  (376 MHz,  $\text{CDCl}_3$ )

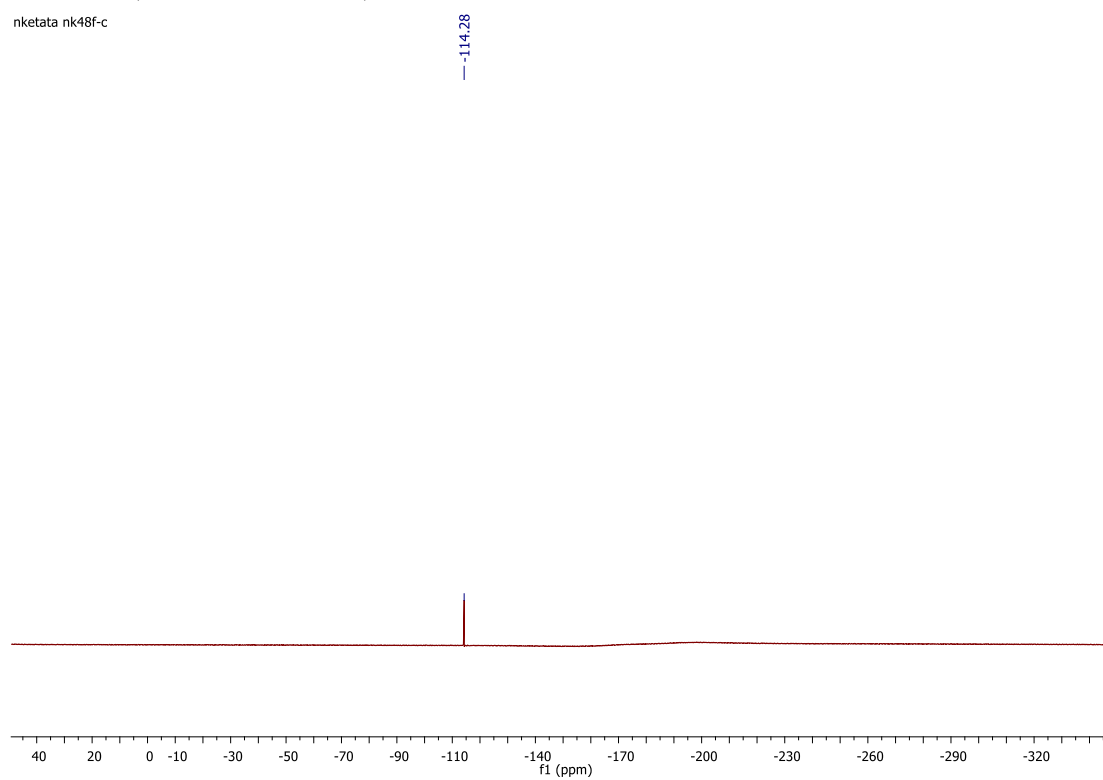

<sup>13</sup>C NMR (100 MHz, CDCl<sub>3</sub>)

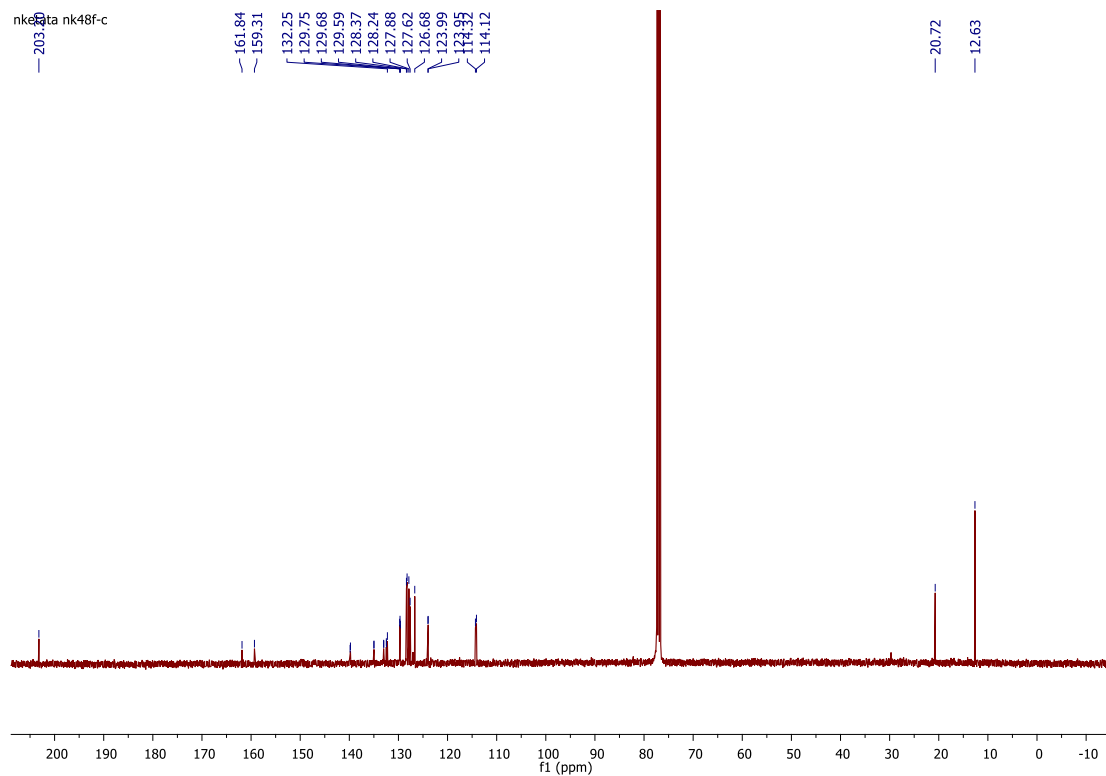

# 8-Chloro-7-fluorofluoranthene (7)

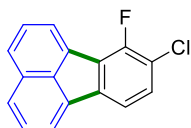

## $^1\text{H}$ NMR (400MHz, $\text{CDCl}_3$ )

nketata nk74zfx

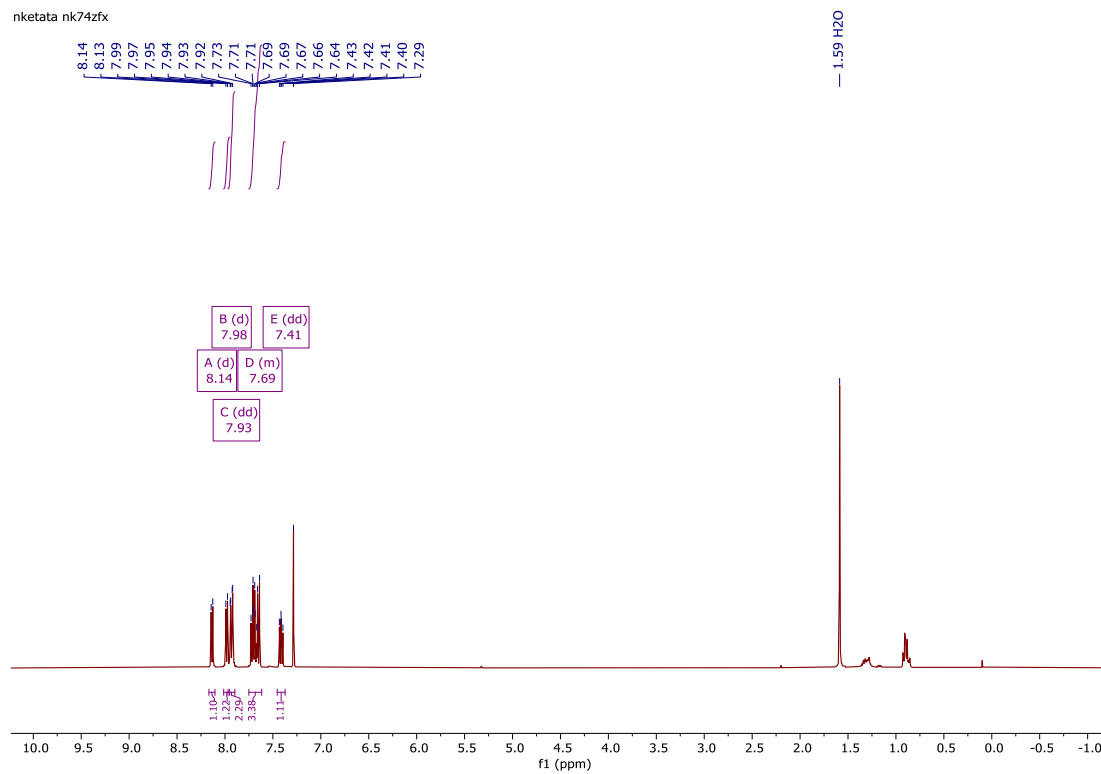

## $^{19}\text{F}$ NMR (376 MHz, $\text{CDCl}_3$ )

nketata nk74zfx

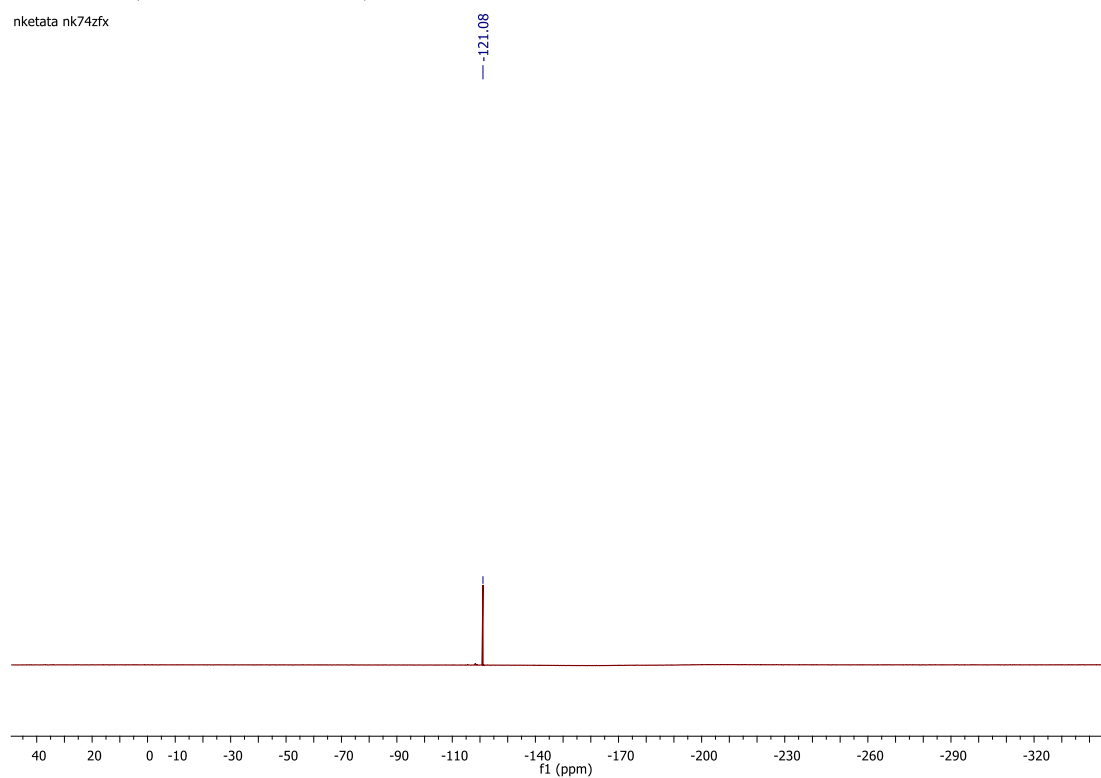

$^{13}\text{C}$  NMR (100 MHz,  $\text{CDCl}_3$ )

nketata nk74zfx

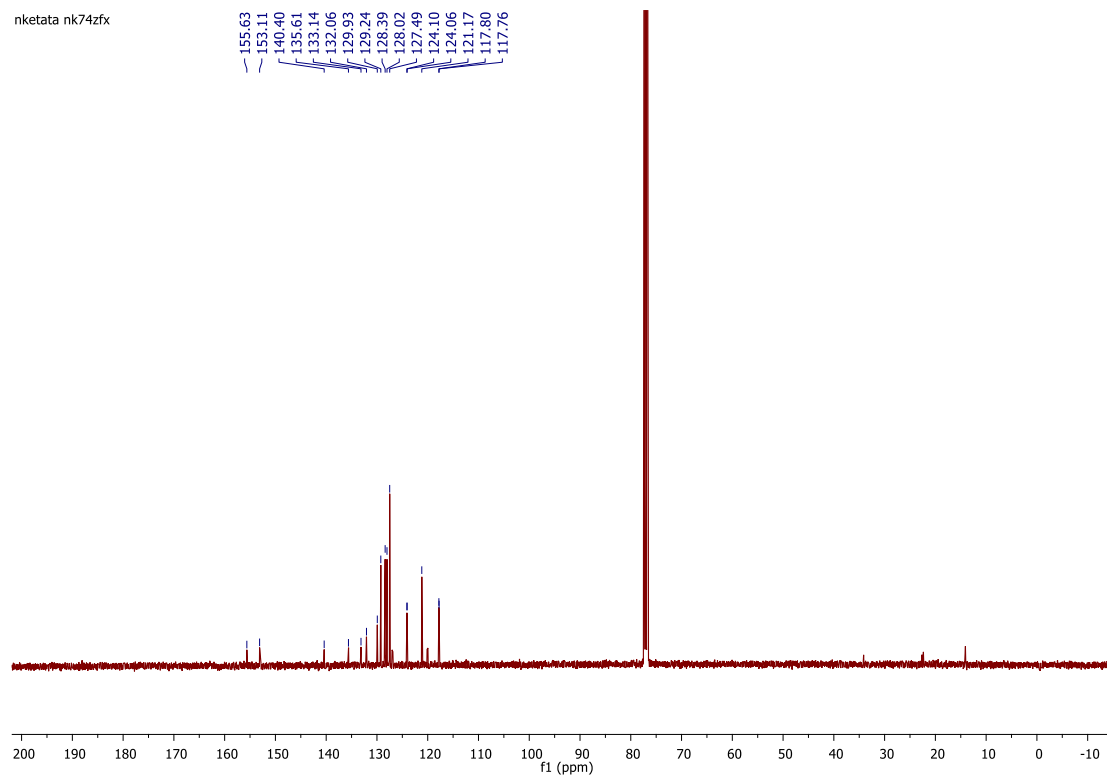

# 7-Fluorofluoranthene-8-carbonitrile (8)

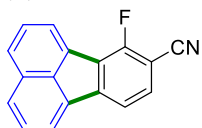

## <sup>1</sup>H NMR (400MHz, CDCl<sub>3</sub>)

nketata nk93f

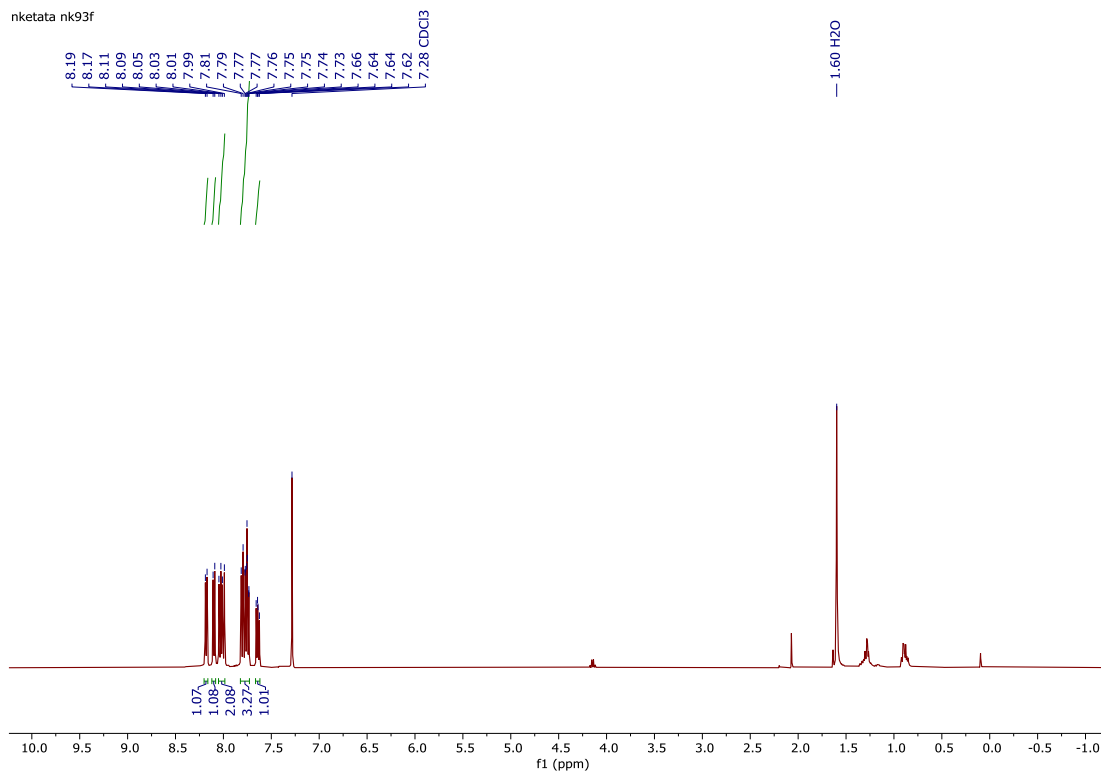

## <sup>19</sup>F NMR (376 MHz, CDCl<sub>3</sub>)

nketata nk93zf

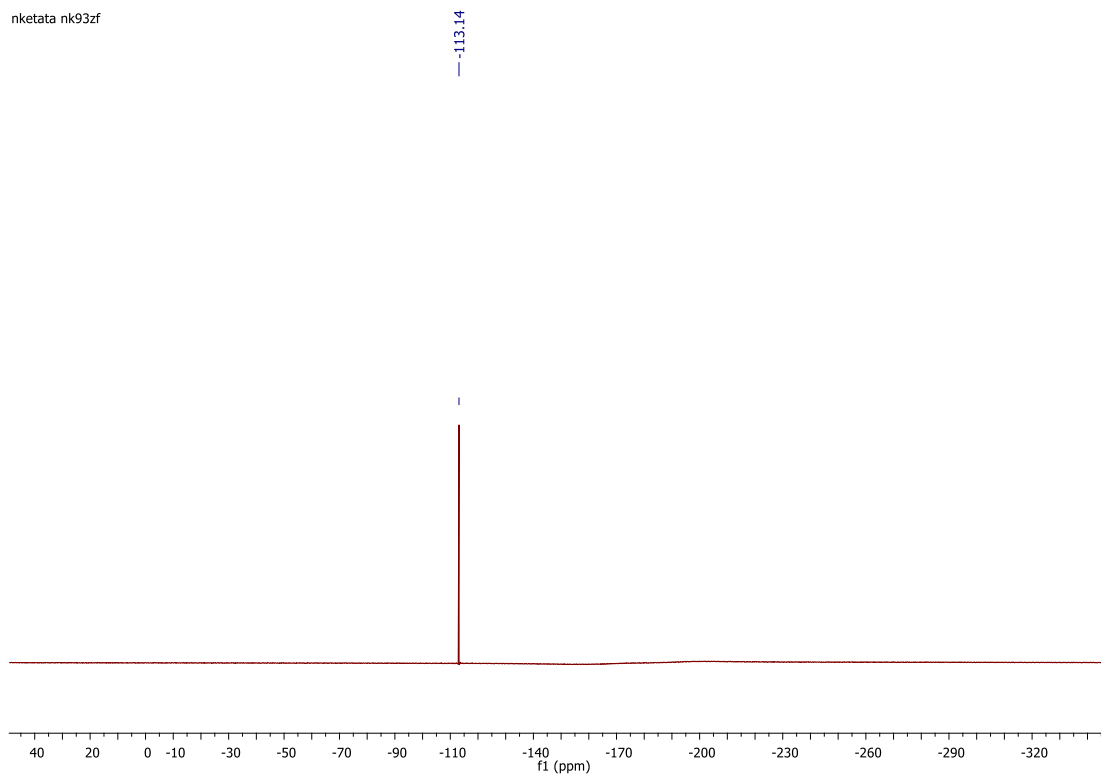



$^{13}\text{C}$  NMR (100 MHz,  $\text{CDCl}_3$ )

nketata nk93zf

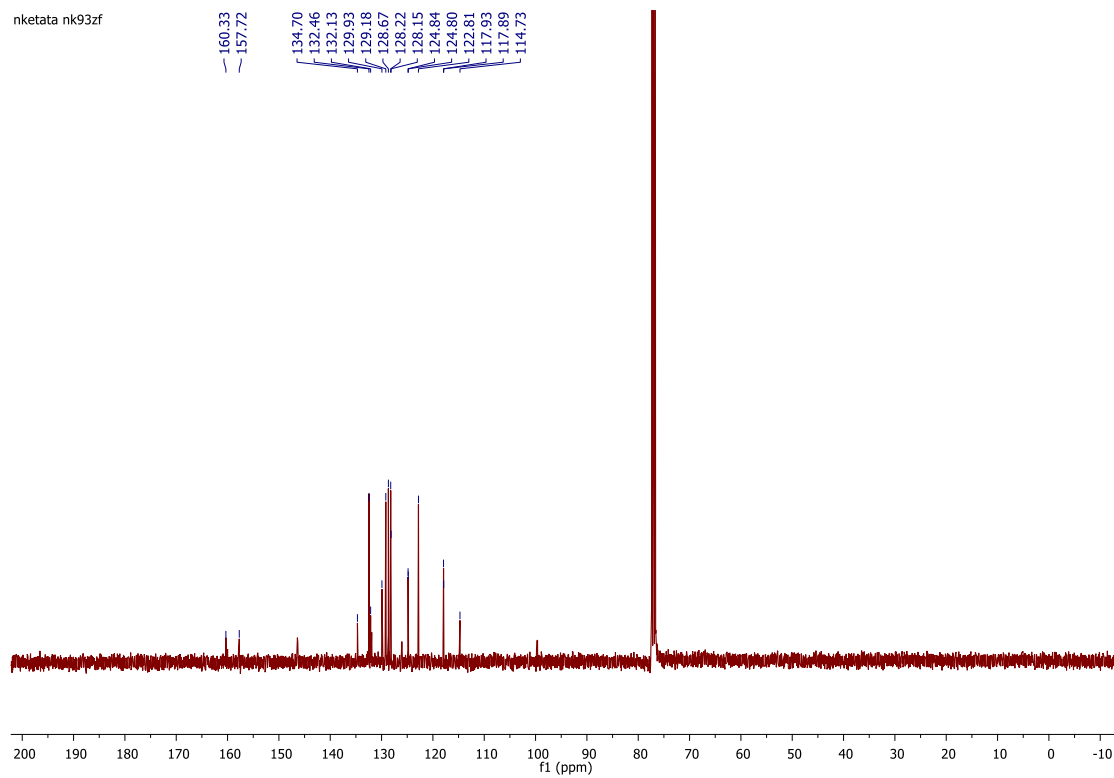

# 7,8,9-Trifluorofluoranthene (9)

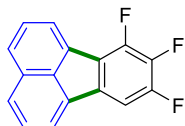

## <sup>1</sup>H NMR (500MHz, CDCl<sub>3</sub>)

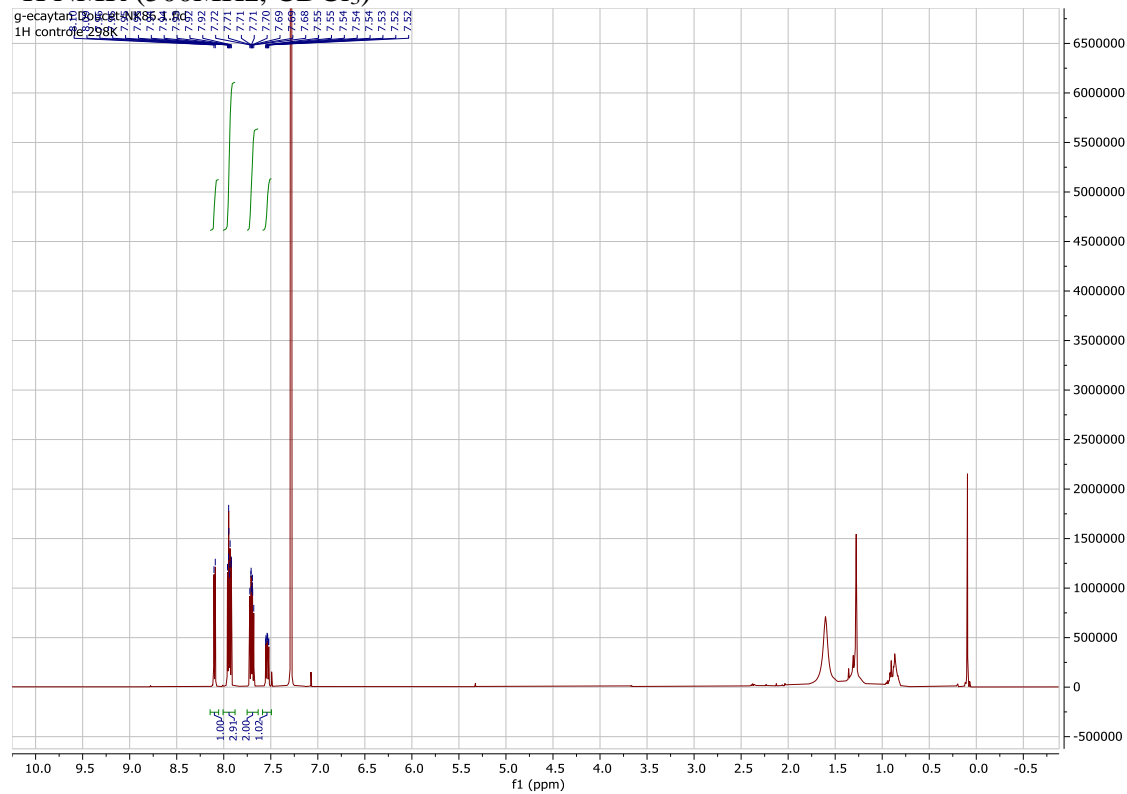

## <sup>19</sup>F NMR (376 MHz, CDCl<sub>3</sub>)

nketata nk86t9f

-135.25  
-139.61  
-162.02

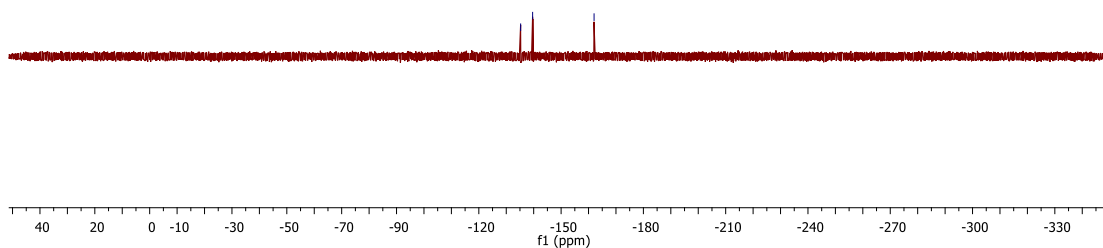

# <sup>13</sup>C NMR (125 MHz, CDCl<sub>3</sub>)

g-ecaytan Doucet-NK86.2.fid  
13C cryosonde

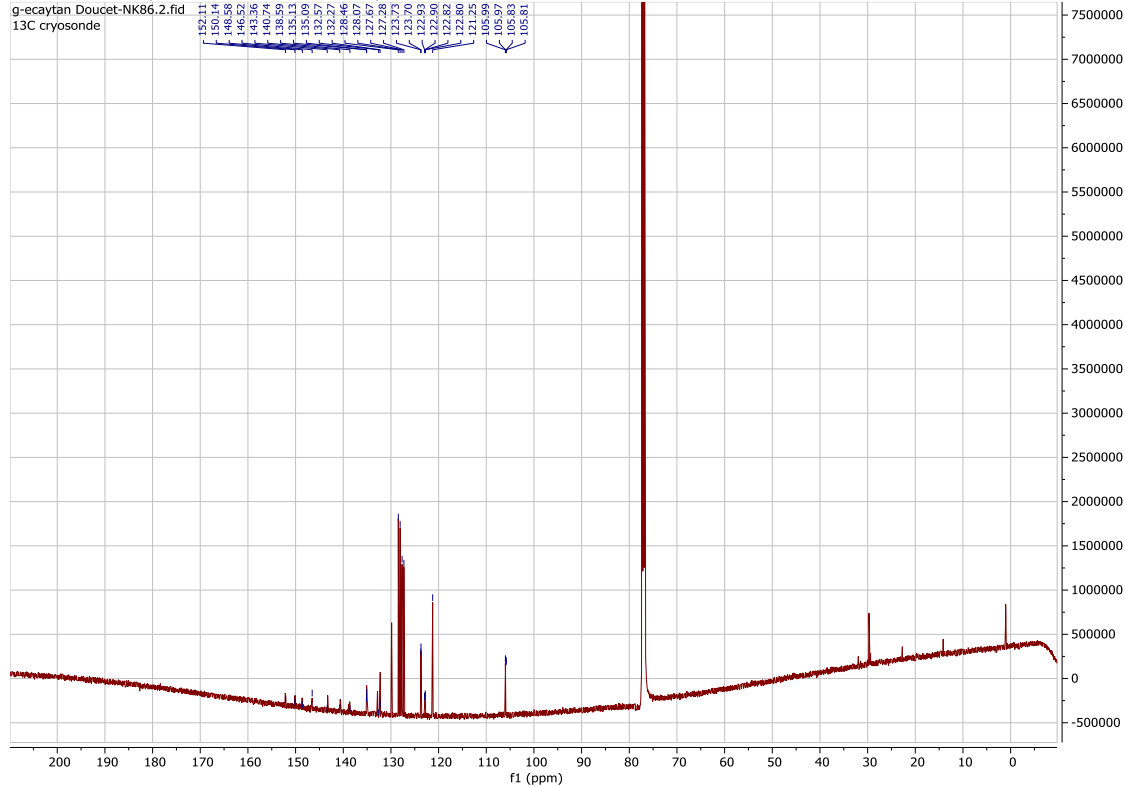

<sup>13</sup>C{<sup>1</sup>H}

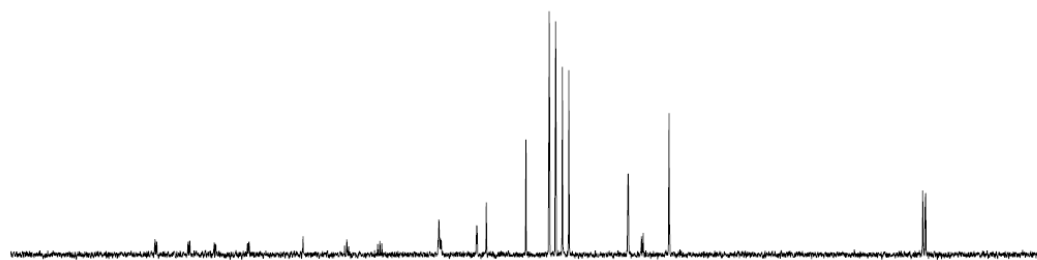

<sup>13</sup>C {<sup>19</sup>F}

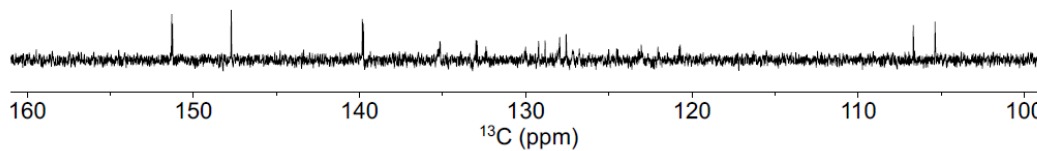

## 7,8-Difluoro-9-methylfluoranthene (10)

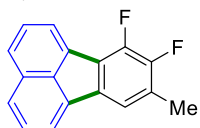

$^1\text{H}$  NMR (400MHz,  $\text{CDCl}_3$ )

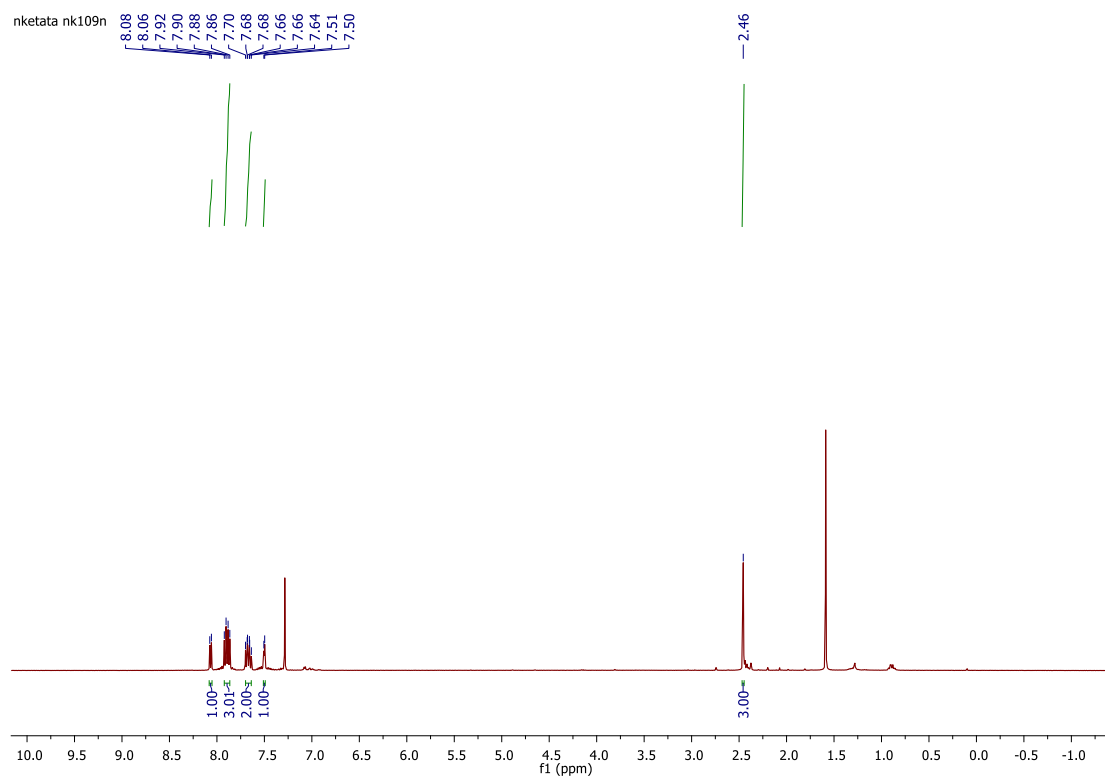

$^{19}\text{F}$  NMR (376 MHz,  $\text{CDCl}_3$ )

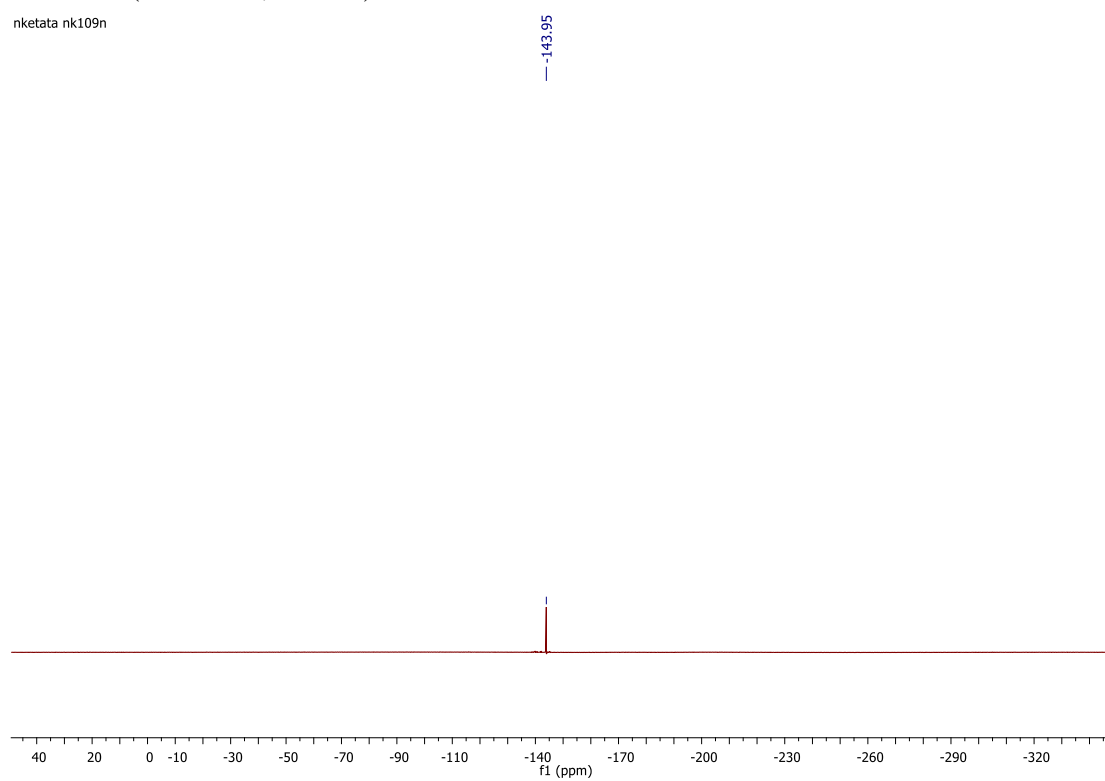

<sup>13</sup>C NMR (100 MHz, CDCl<sub>3</sub>)

nketata nk109xx

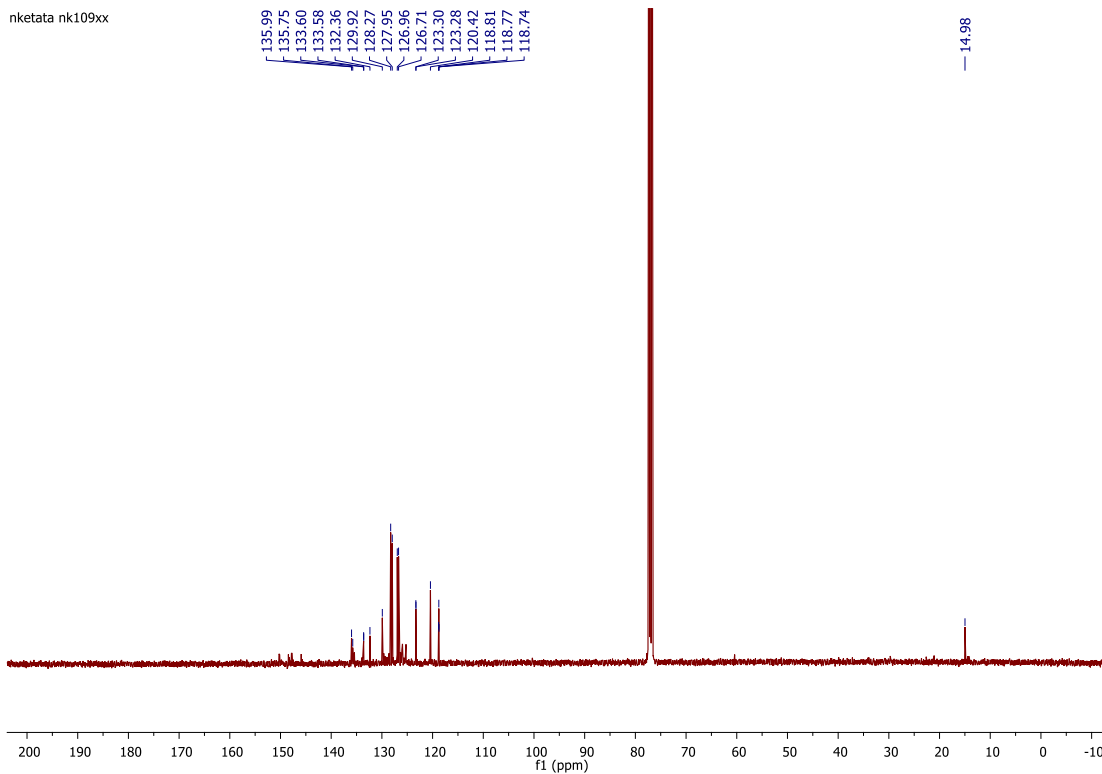

# 8-Chloro-7-fluoro-10-methoxyfluoranthene (11)

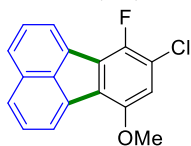

## <sup>1</sup>H NMR (400MHz, CDCl<sub>3</sub>)

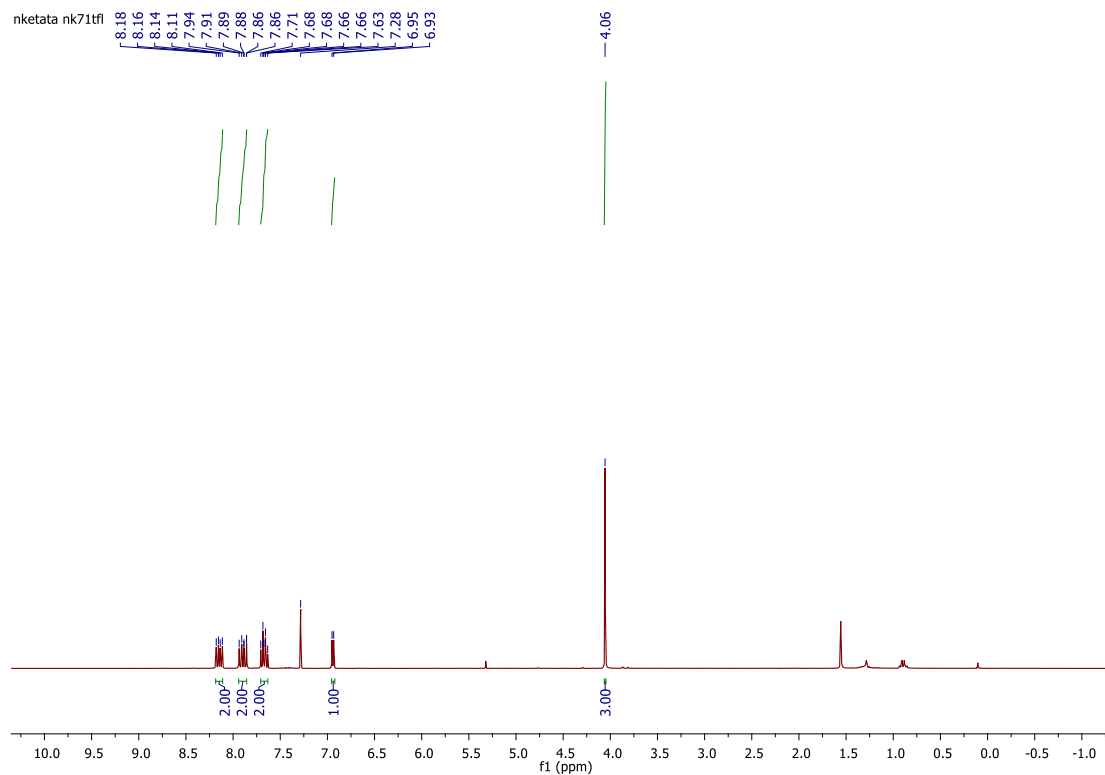

## <sup>19</sup>F NMR (376 MHz, CDCl<sub>3</sub>)

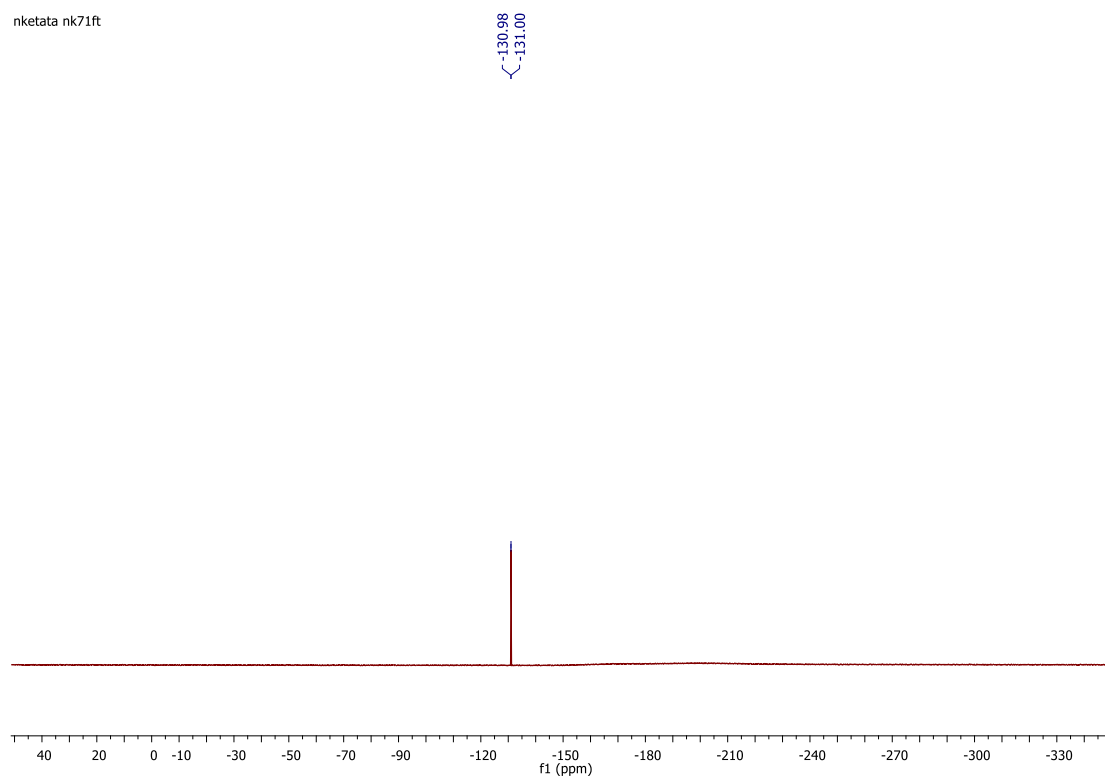

<sup>13</sup>C NMR (100 MHz, CDCl<sub>3</sub>)

nketata nk71tf-c

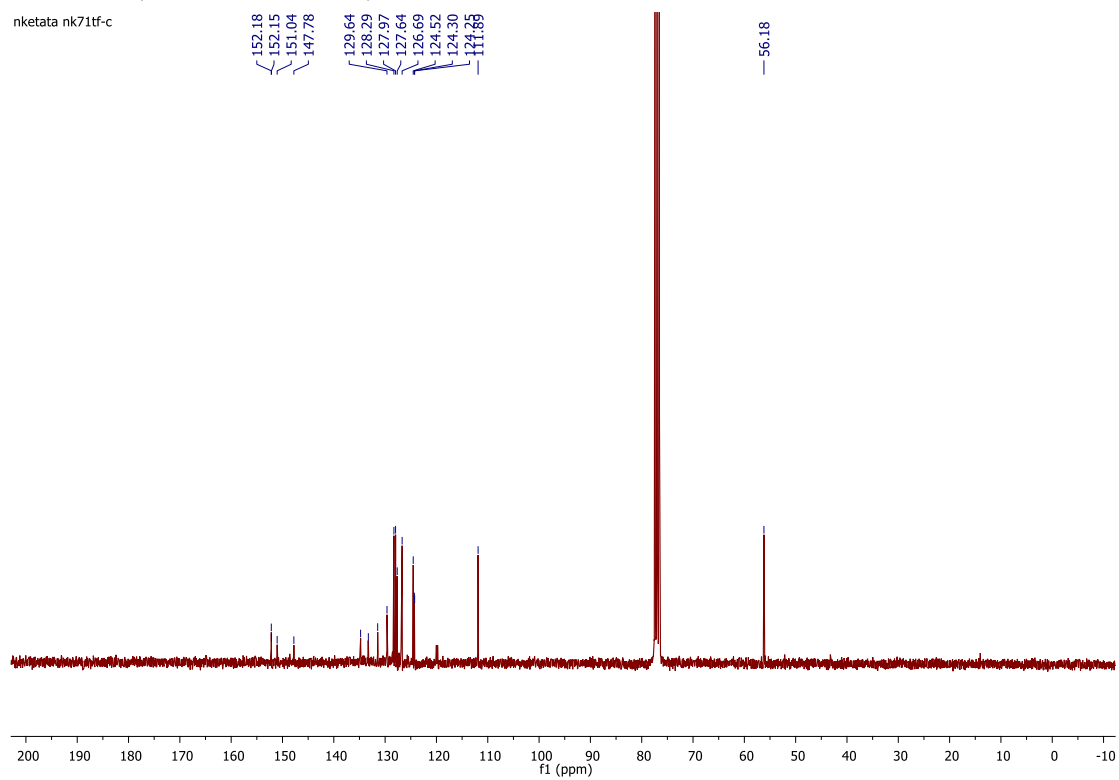

## 8,10-Dichloro-7-fluorofluoranthene (12)

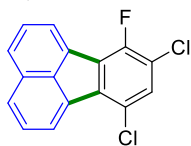

### $^1\text{H}$ NMR (400MHz, $\text{CDCl}_3$ )

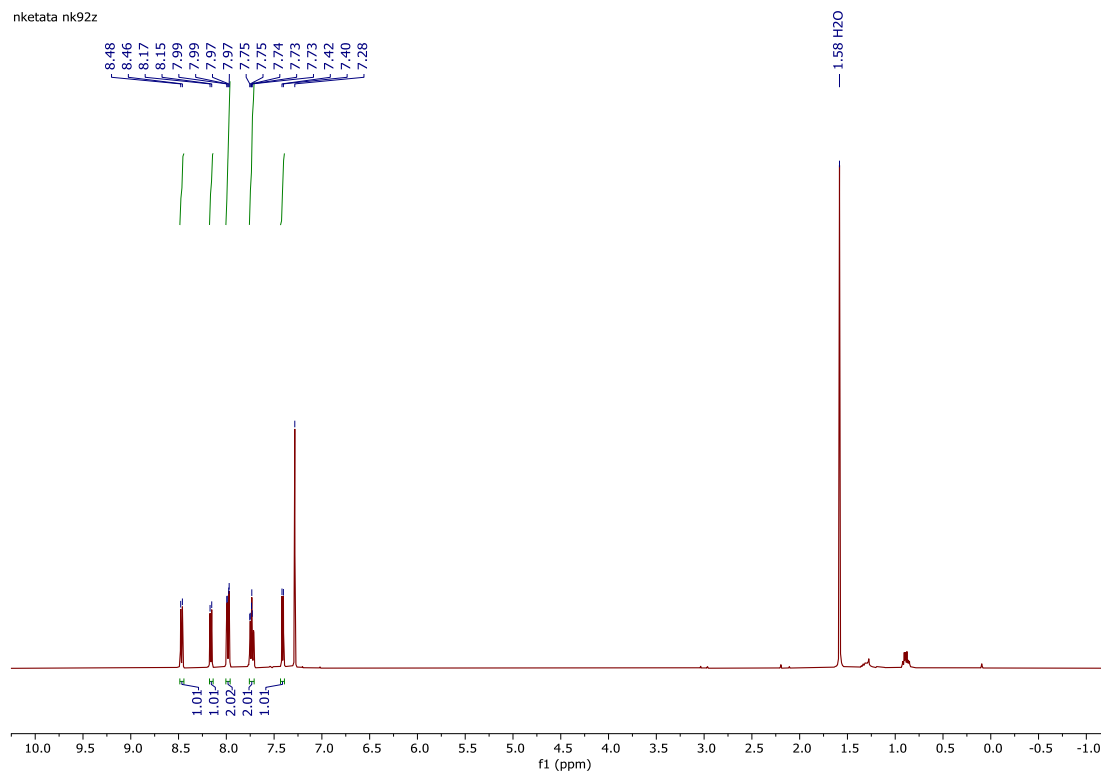

### $^{19}\text{F}$ NMR (376 MHz, $\text{CDCl}_3$ )

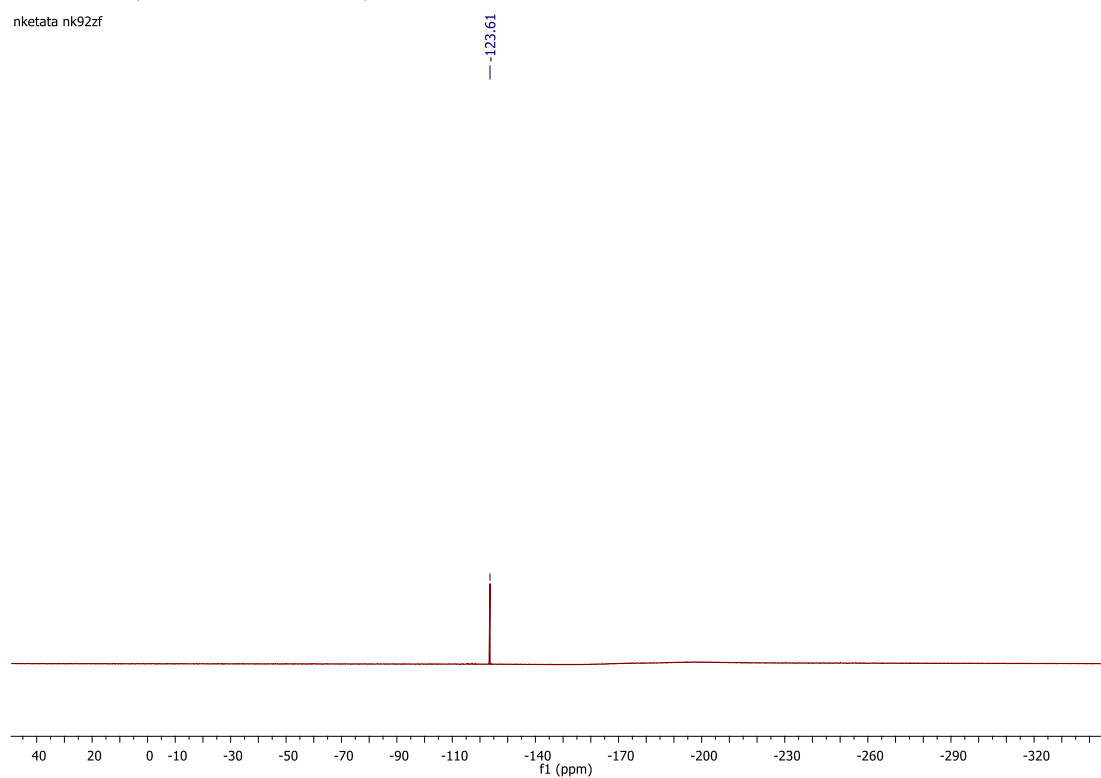



$^{13}\text{C}$  NMR (100 MHz,  $\text{CDCl}_3$ )

nketata nk92cv

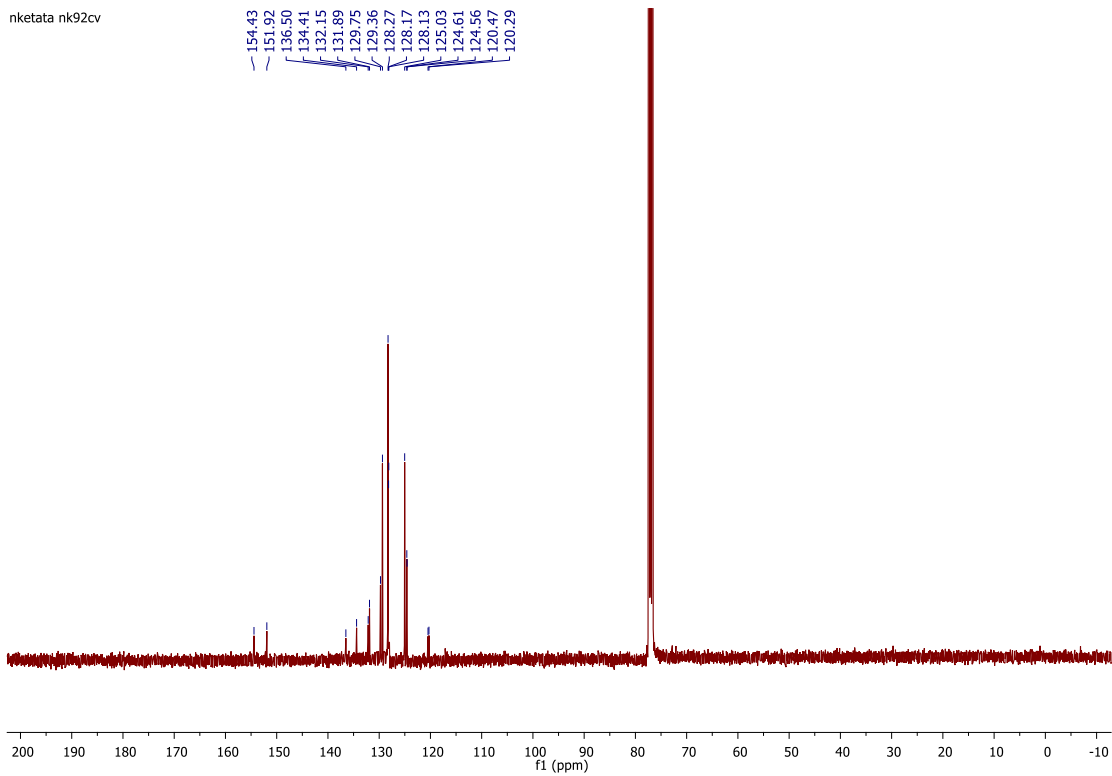

# 10-Chloro-7-fluoro-8-methylfluoranthene (13)

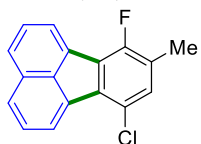

## <sup>1</sup>H NMR (400MHz, CDCl<sub>3</sub>)

nketata nk94zf

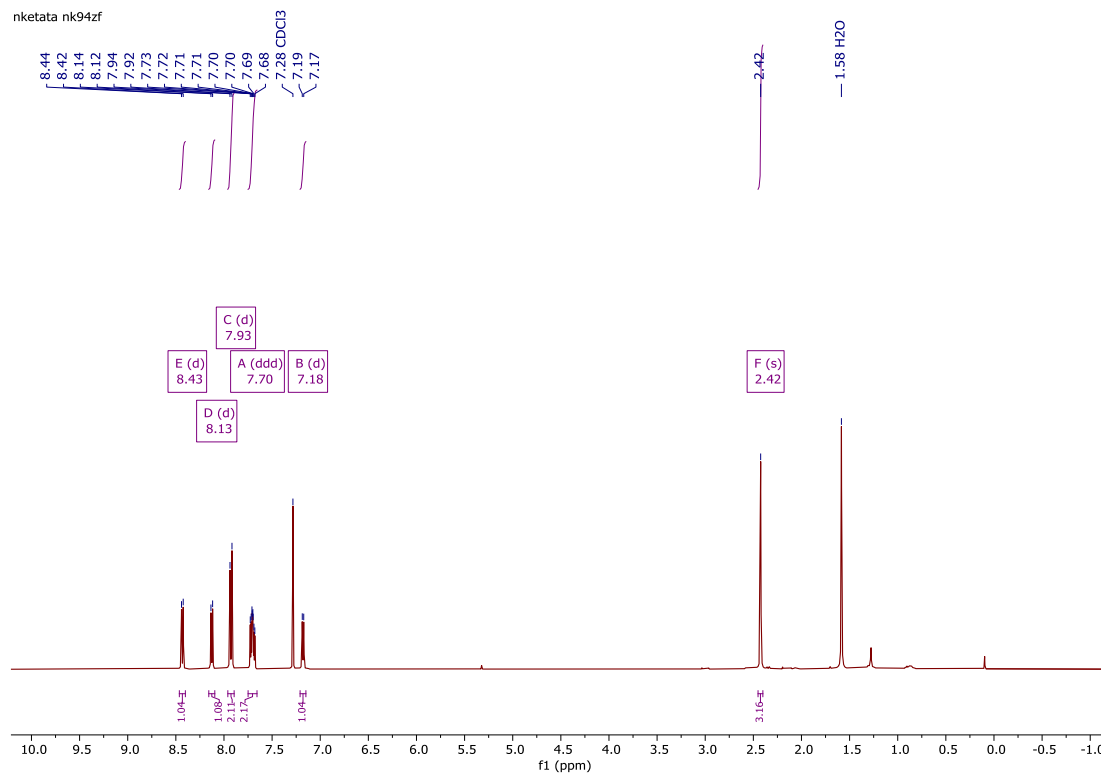

## <sup>19</sup>F NMR (376 MHz, CDCl<sub>3</sub>)

nketata nk94zf

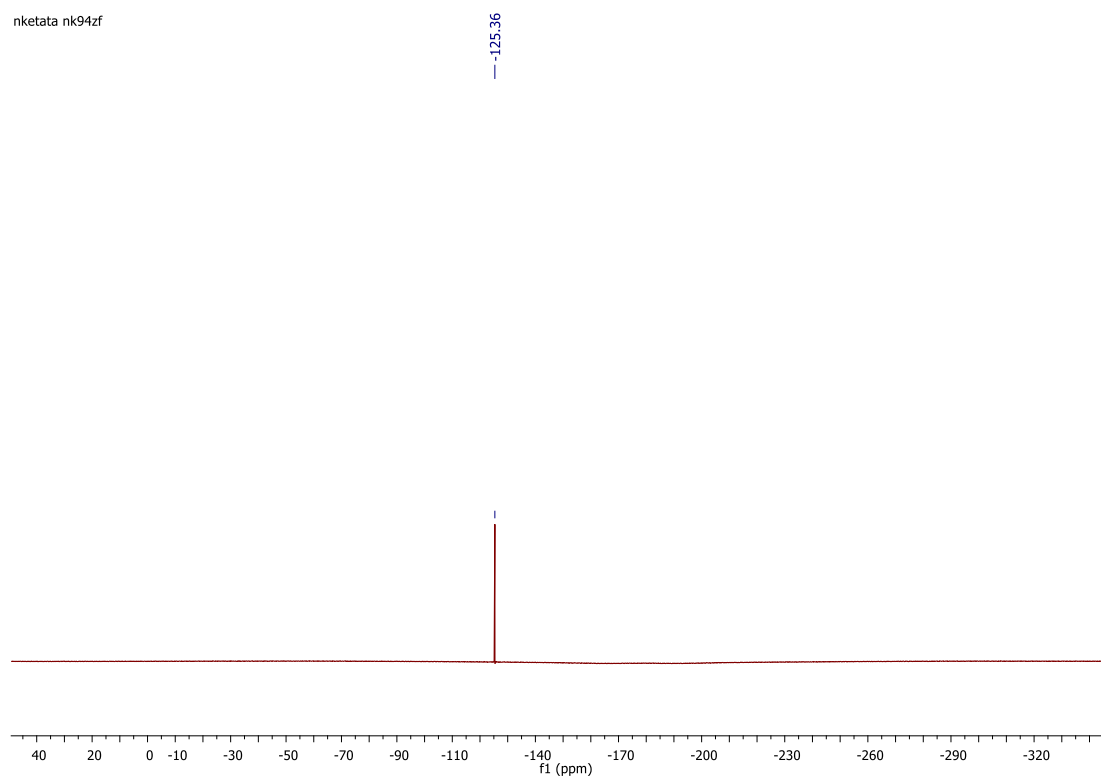

<sup>13</sup>C NMR (100 MHz, CDCl<sub>3</sub>)

nketata nk94zf

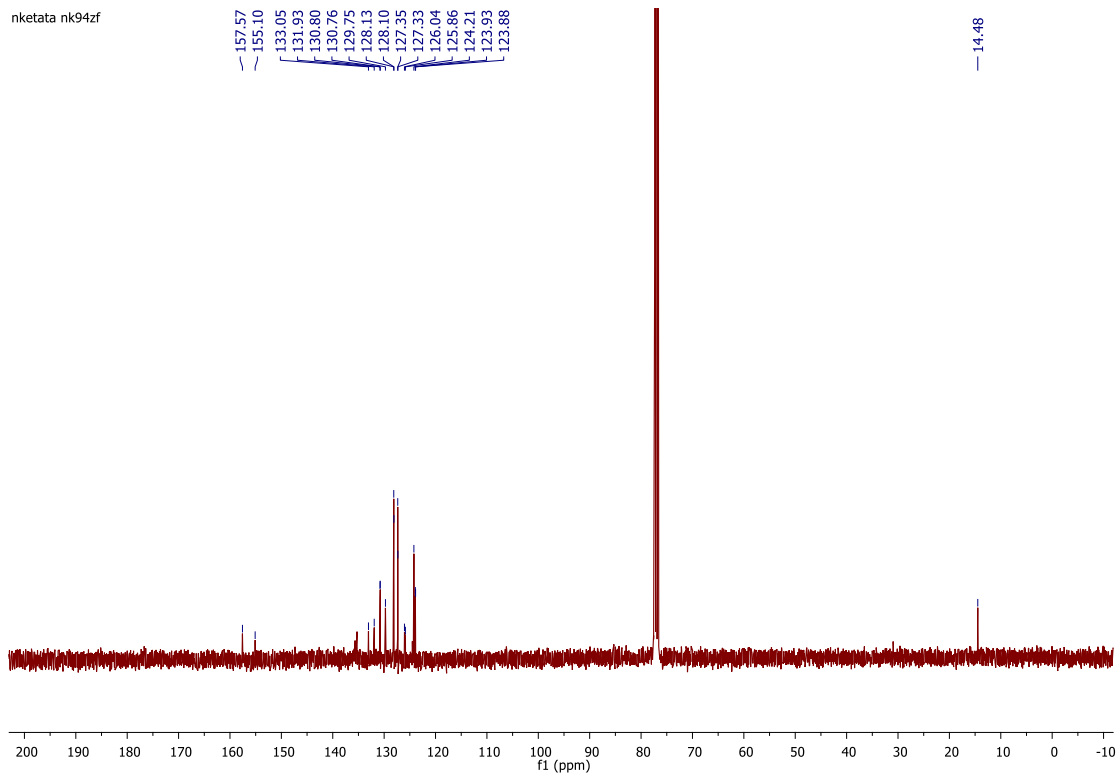

### 8-Chloro-10-fluoro-7-methylfluoranthene (14)

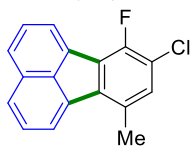

### $^1\text{H}$ NMR (400MHz, $\text{CDCl}_3$ )

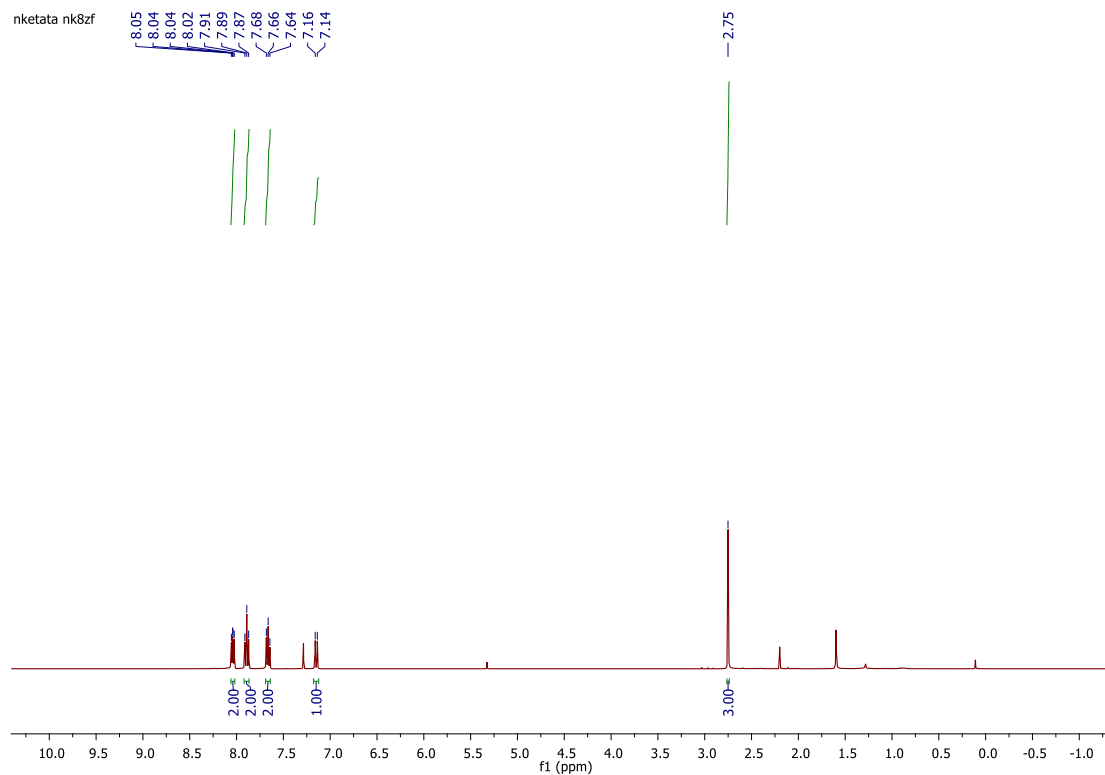

### $^{19}\text{F}$ NMR (376 MHz, $\text{CDCl}_3$ )

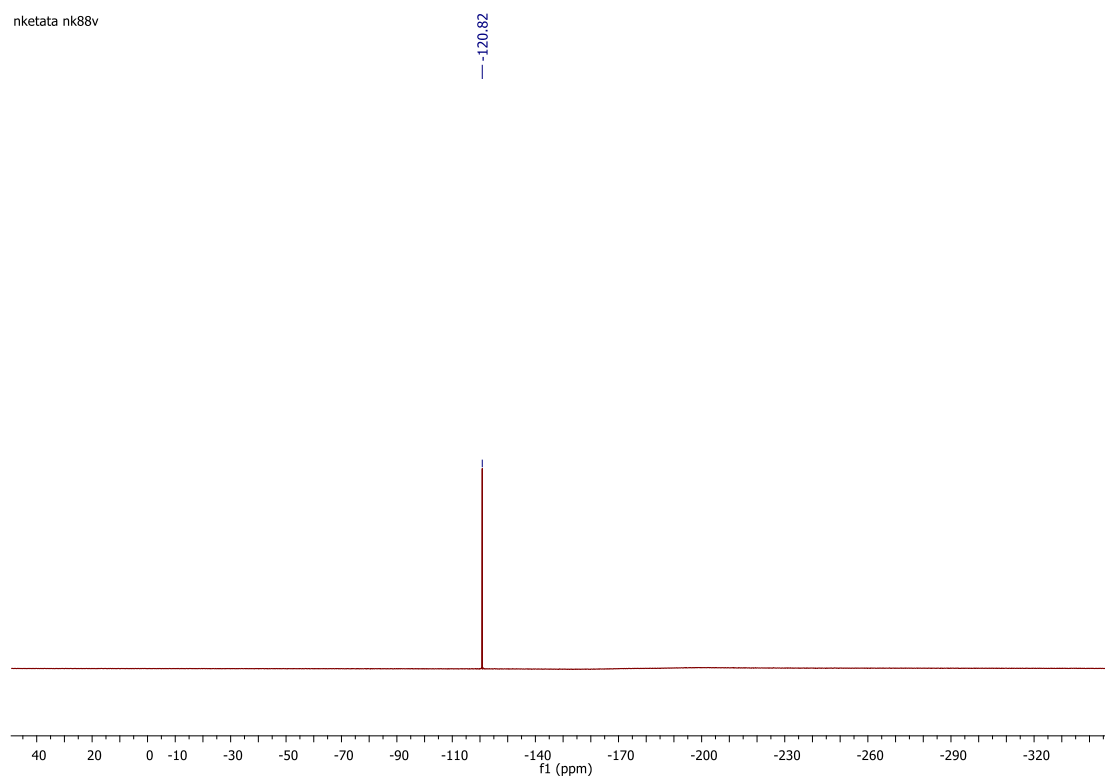

<sup>13</sup>C NMR (100 MHz, CDCl<sub>3</sub>)

nketata nk8zf

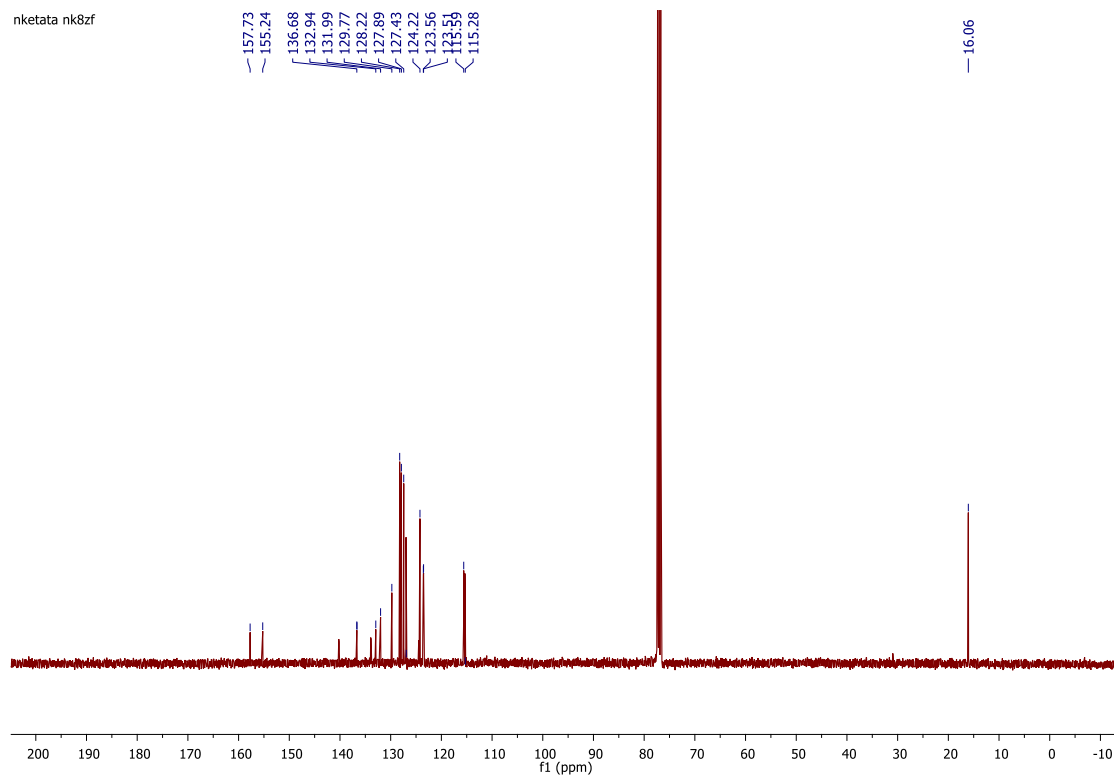

# 7,9-Dichlorofluoranthene (15)

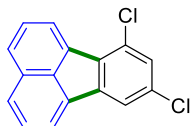

## <sup>1</sup>H NMR (400MHz, CDCl<sub>3</sub>)

nketata nk87zf

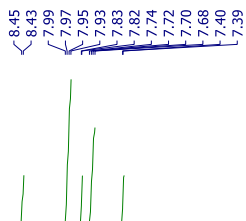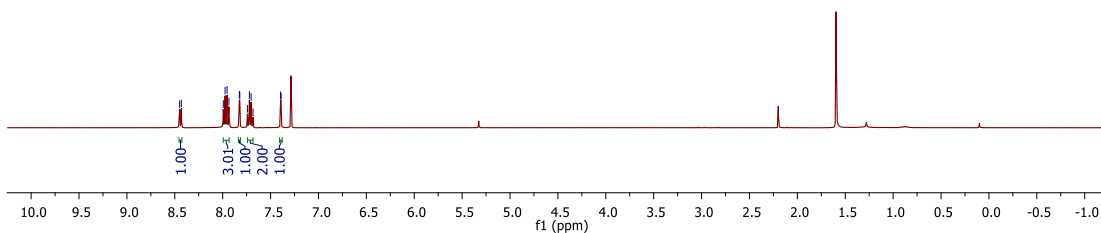

## <sup>13</sup>C NMR (100 MHz, CDCl<sub>3</sub>)

nketata nk87zf

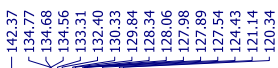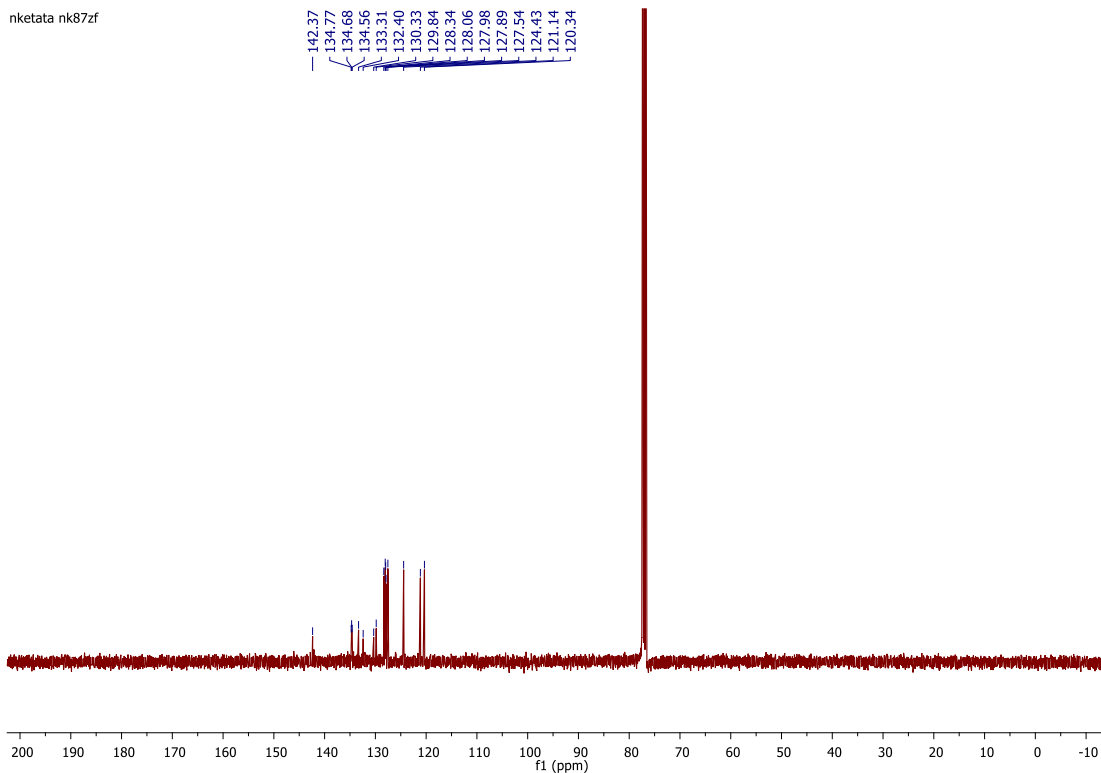

# 7,9-Dimethylacenaphtho[1,2-c]thiophene (16)

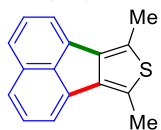

## <sup>1</sup>H NMR (400MHz, CDCl<sub>3</sub>)

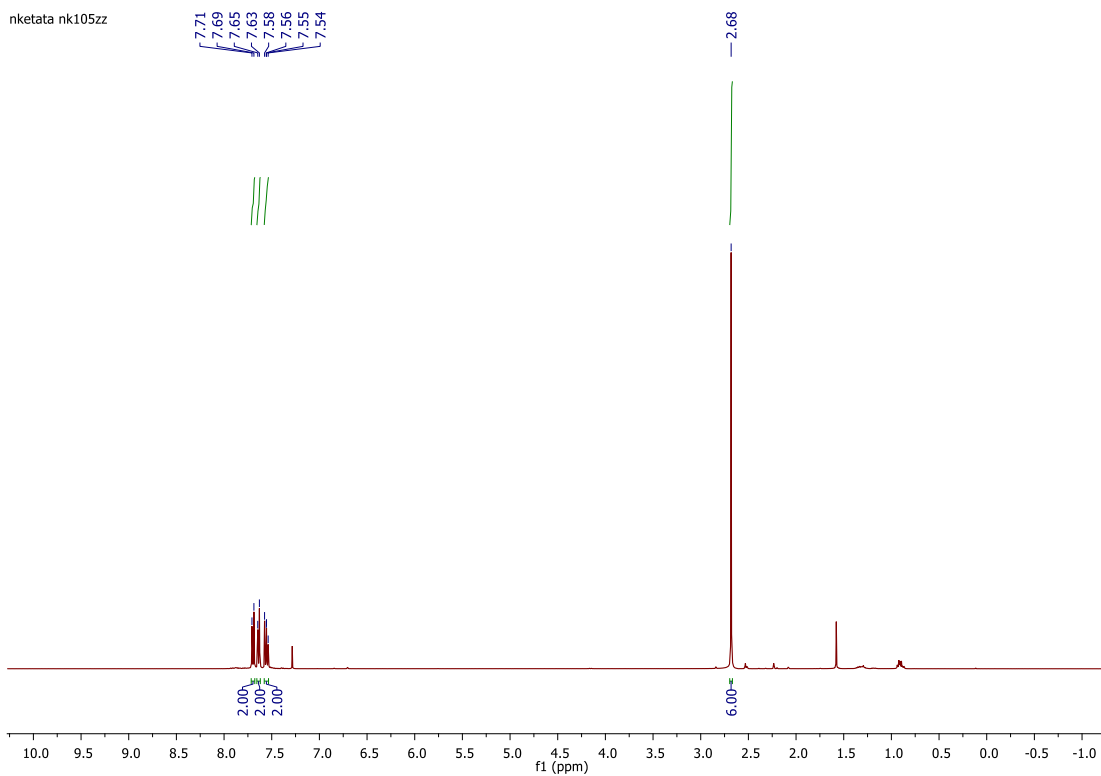

## <sup>13</sup>C NMR (100 MHz, CDCl<sub>3</sub>)

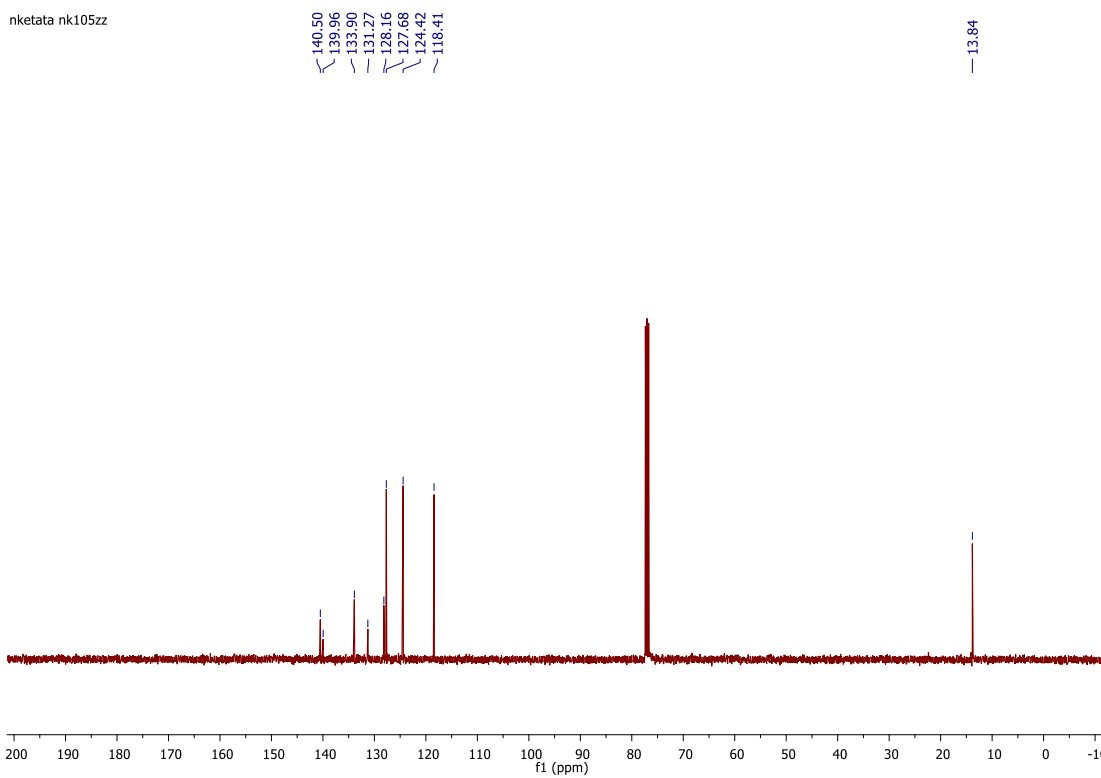

# 7,8,9-Trimethyl-8H-acenaphtho[1,2-c]pyrrole (17)

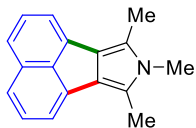

## <sup>1</sup>H NMR (400MHz, CDCl<sub>3</sub>)

nketata nk118zzg

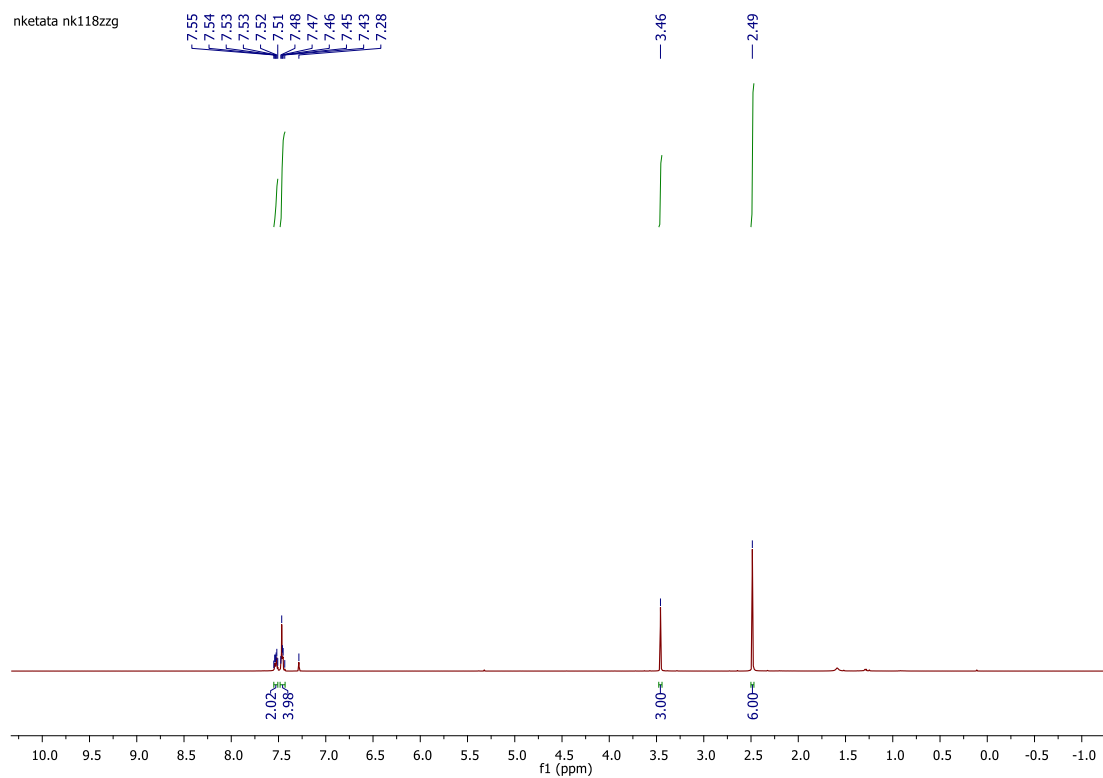

## <sup>13</sup>C NMR (100 MHz, CDCl<sub>3</sub>)

nketata nk118zzg

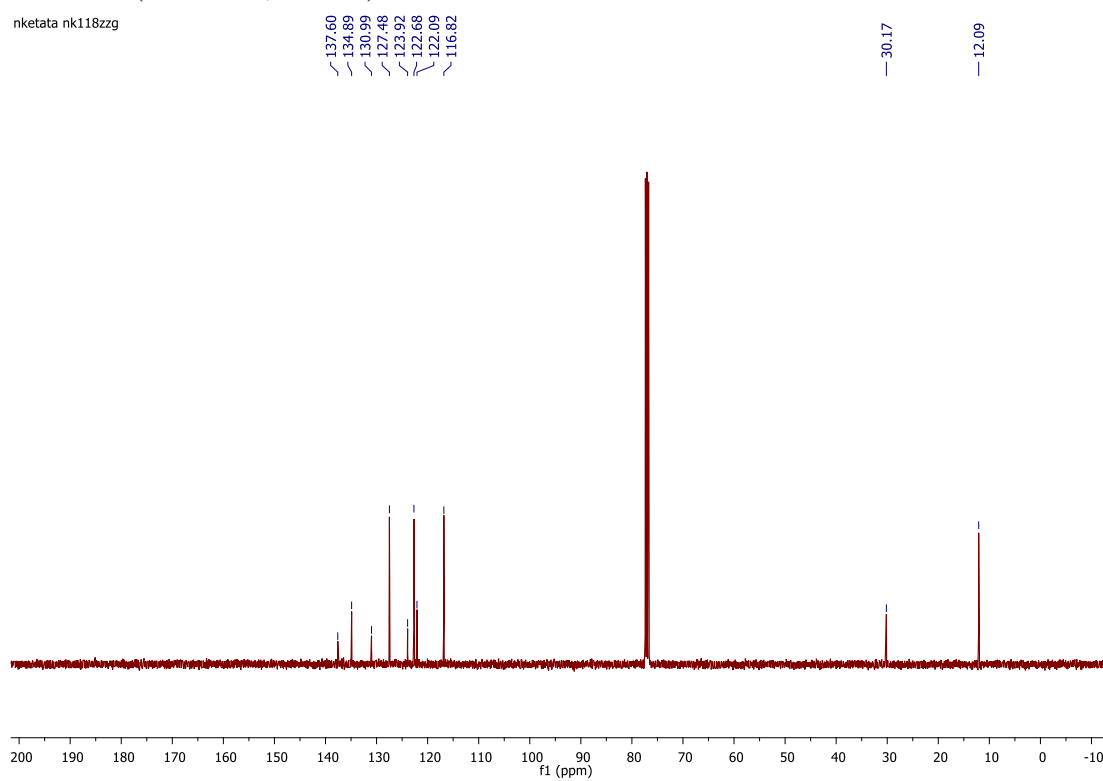



# 1-(9-Methylacnaphtho[1,2-c]furan-7-yl)ethan-1-one (18)

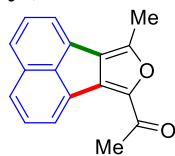

## <sup>1</sup>H NMR (400MHz, CDCl<sub>3</sub>)

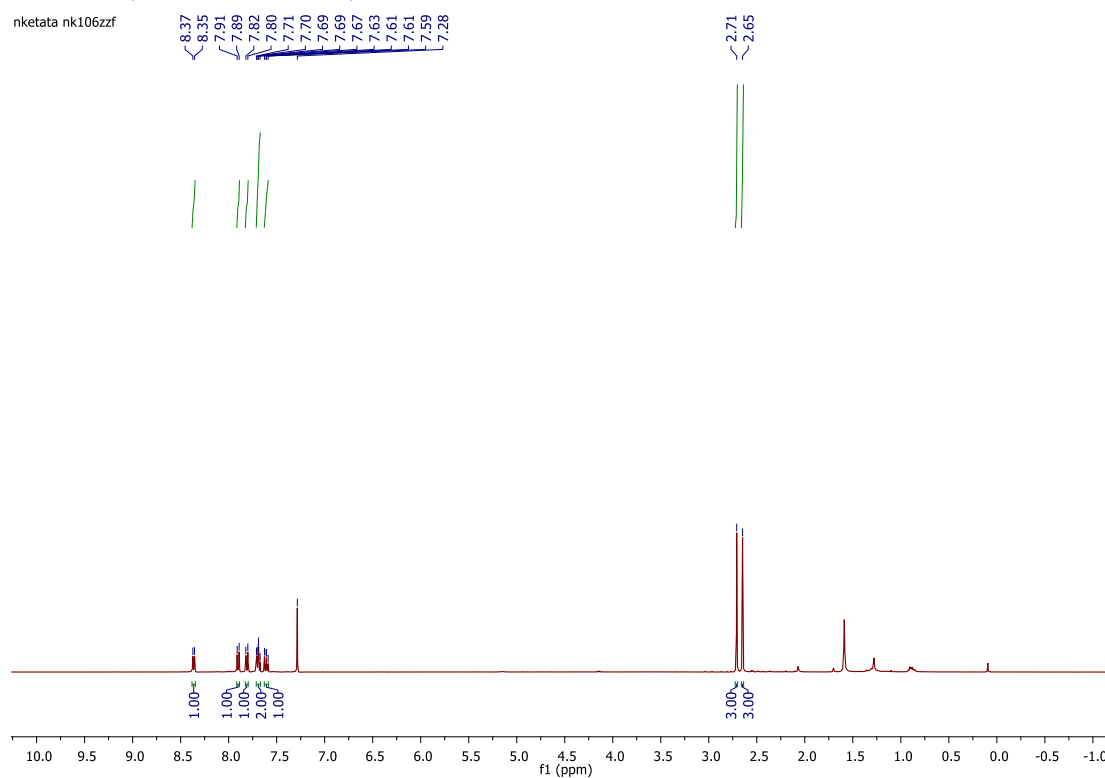

## <sup>13</sup>C NMR (100 MHz, CDCl<sub>3</sub>)

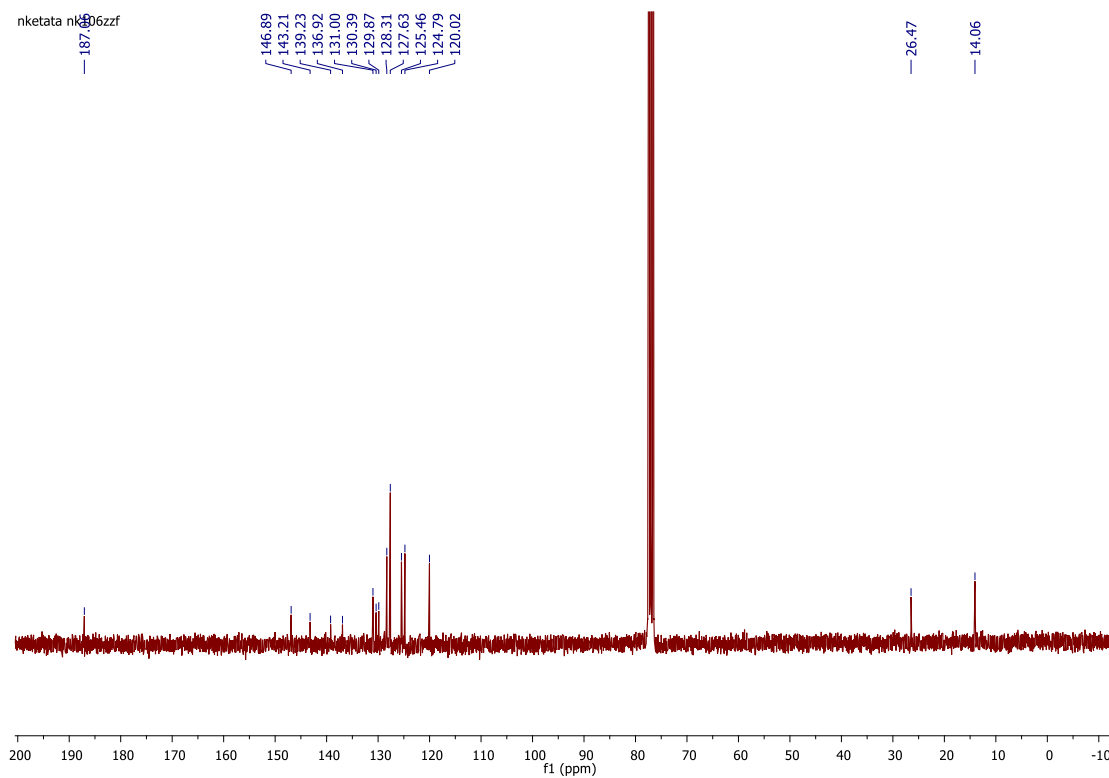

## 7-Ethoxyfluoranthene (19)

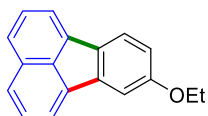

### $^1\text{H}$ NMR (400MHz, $\text{CDCl}_3$ )

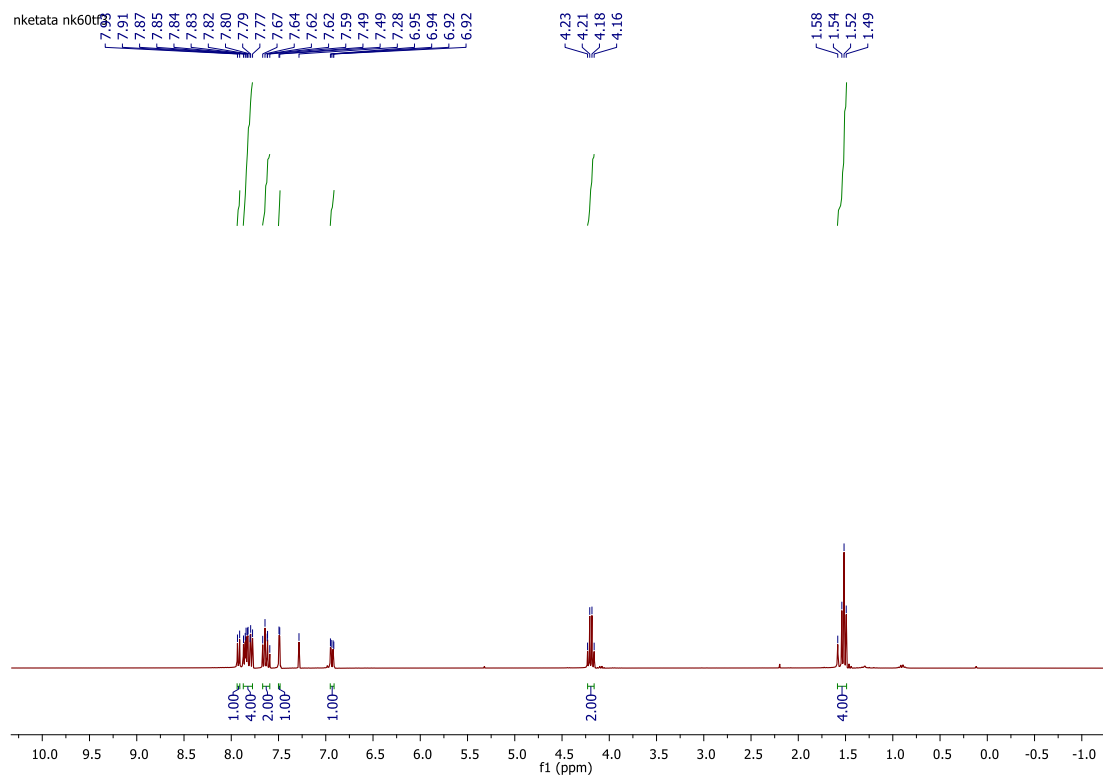

### $^{13}\text{C}$ NMR (100 MHz, $\text{CDCl}_3$ )

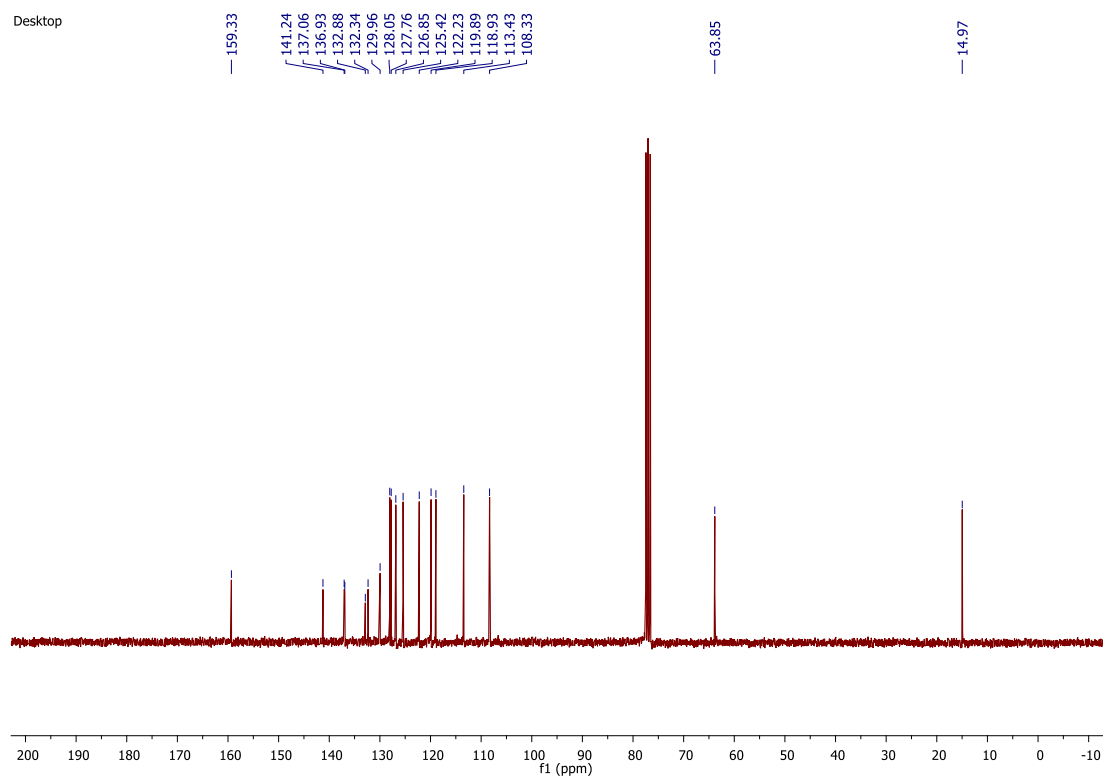

## 8-Methylfluoranthene (20)

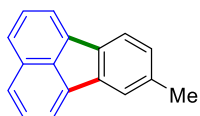

$^1\text{H}$  NMR (400MHz,  $\text{CDCl}_3$ )

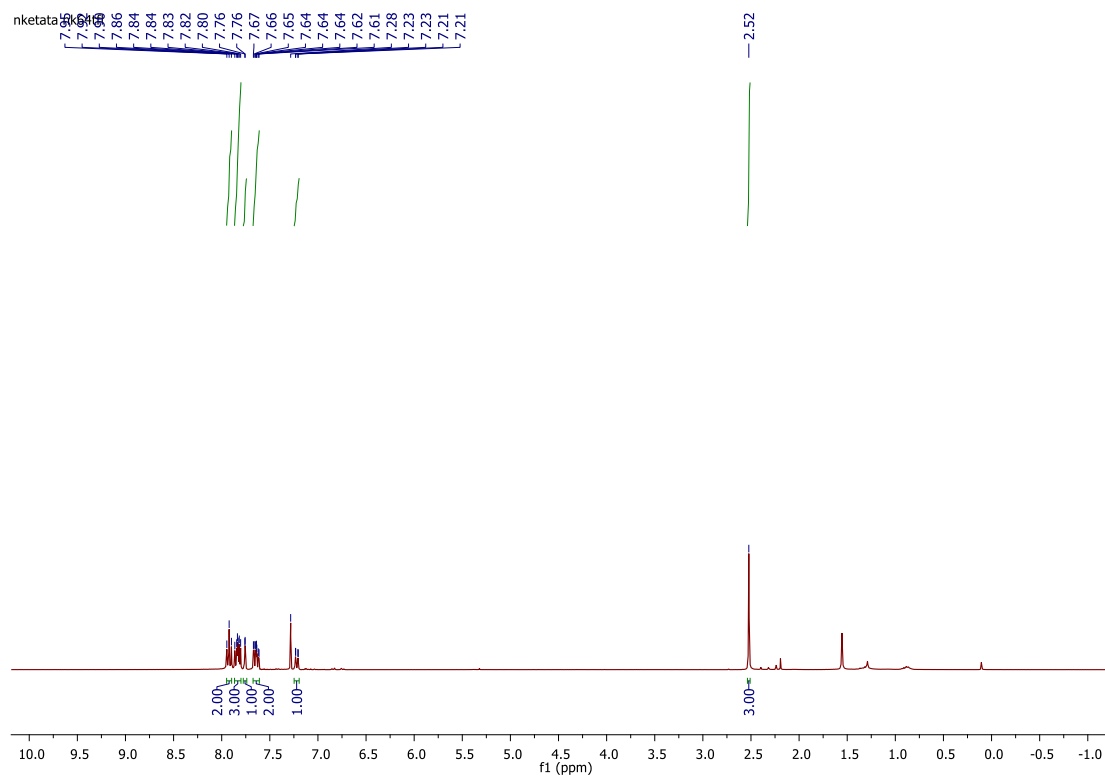

$^{13}\text{C}$  NMR (100 MHz,  $\text{CDCl}_3$ )

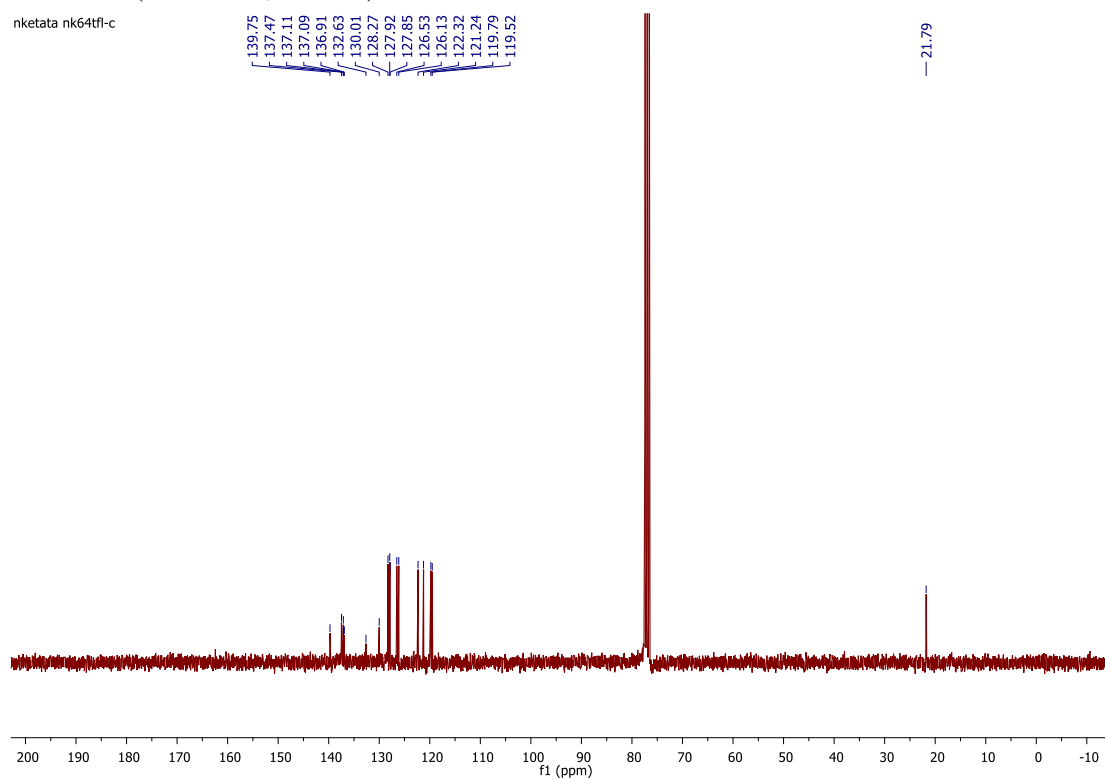

# 8-Chlorofluoranthene (21)

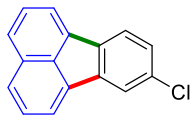

## <sup>1</sup>H NMR (400MHz, CDCl<sub>3</sub>)

nketata nk53tf

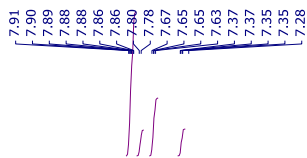

— 1.57 H<sub>2</sub>O

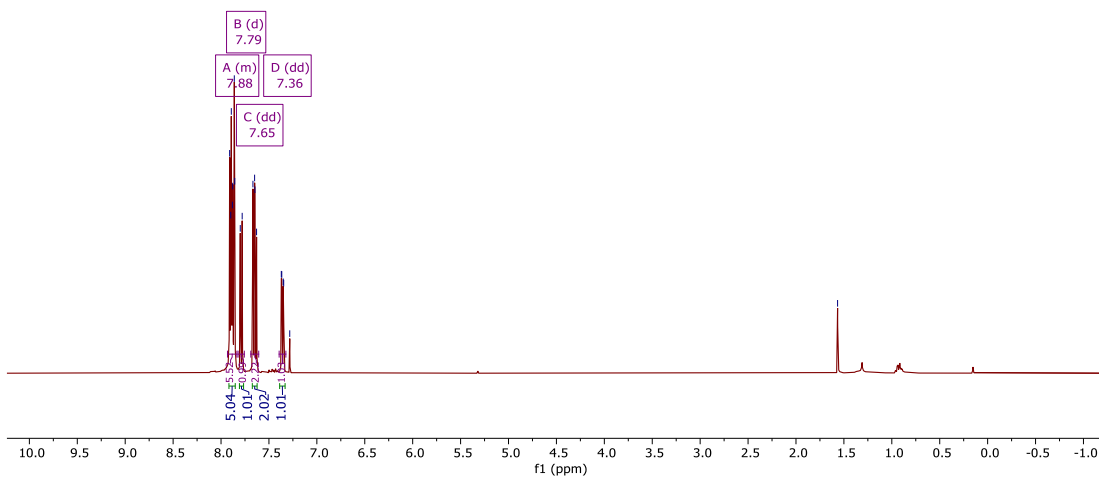

## <sup>13</sup>C NMR (100 MHz, CDCl<sub>3</sub>)

nketata nk53tf

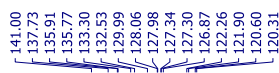

77.38  
77.06  
76.74

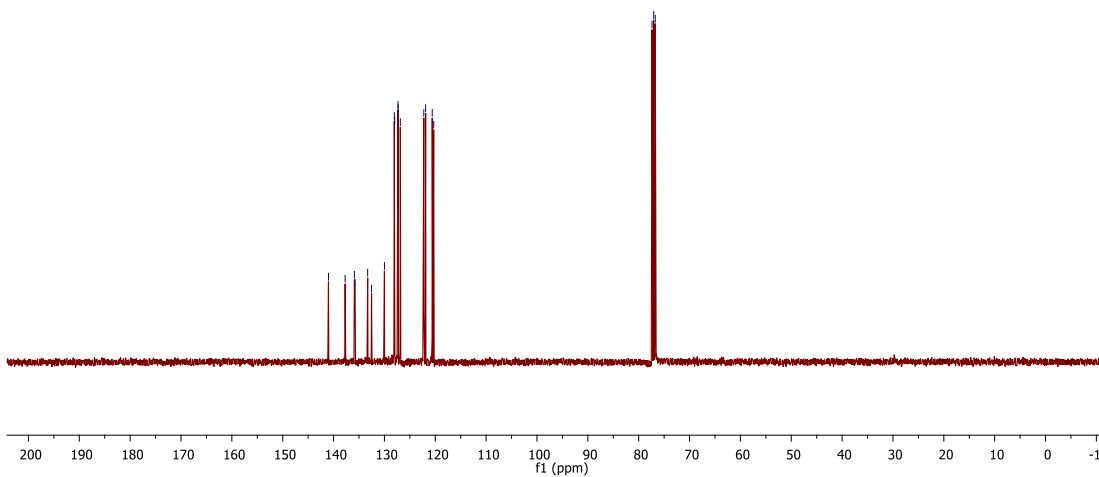

# Methyl fluoranthene-8-carboxylate (22)

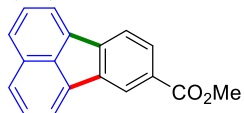

## <sup>1</sup>H NMR (400MHz, CDCl<sub>3</sub>)

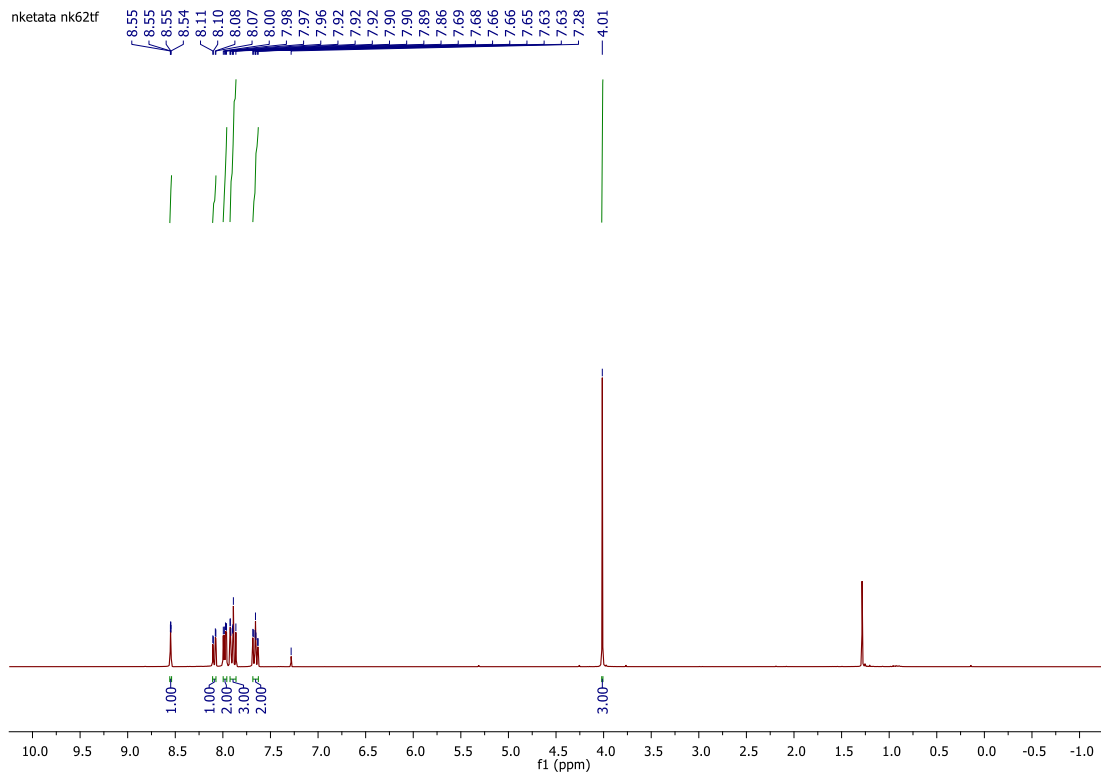

## <sup>13</sup>C NMR (100 MHz, CDCl<sub>3</sub>)

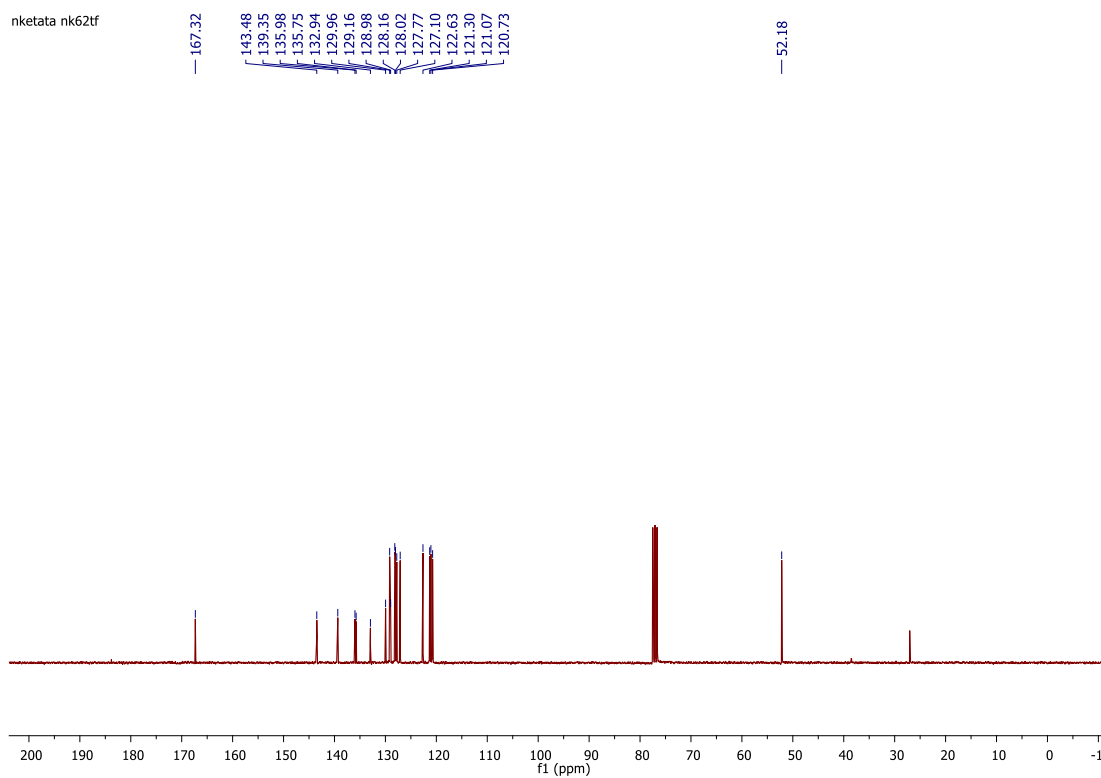

# Fluoranthene-8-carbonitrile (23)

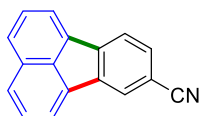

## <sup>1</sup>H NMR (400MHz, CDCl<sub>3</sub>)

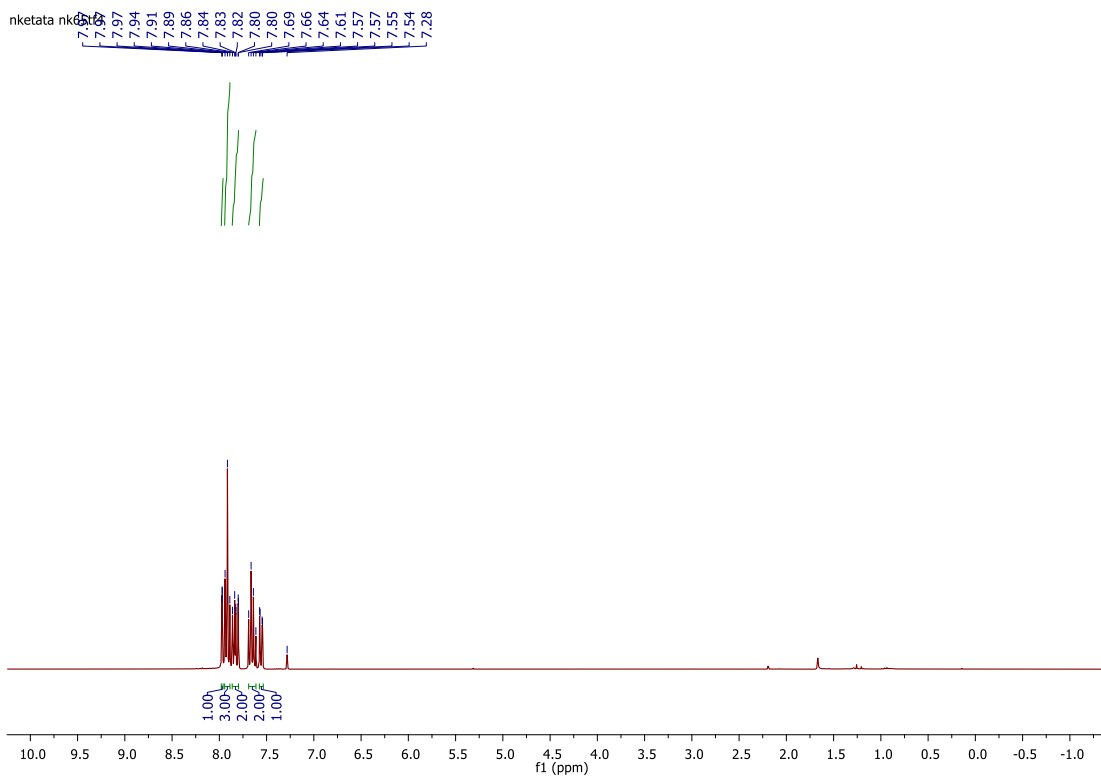

## <sup>13</sup>C NMR (100 MHz, CDCl<sub>3</sub>)

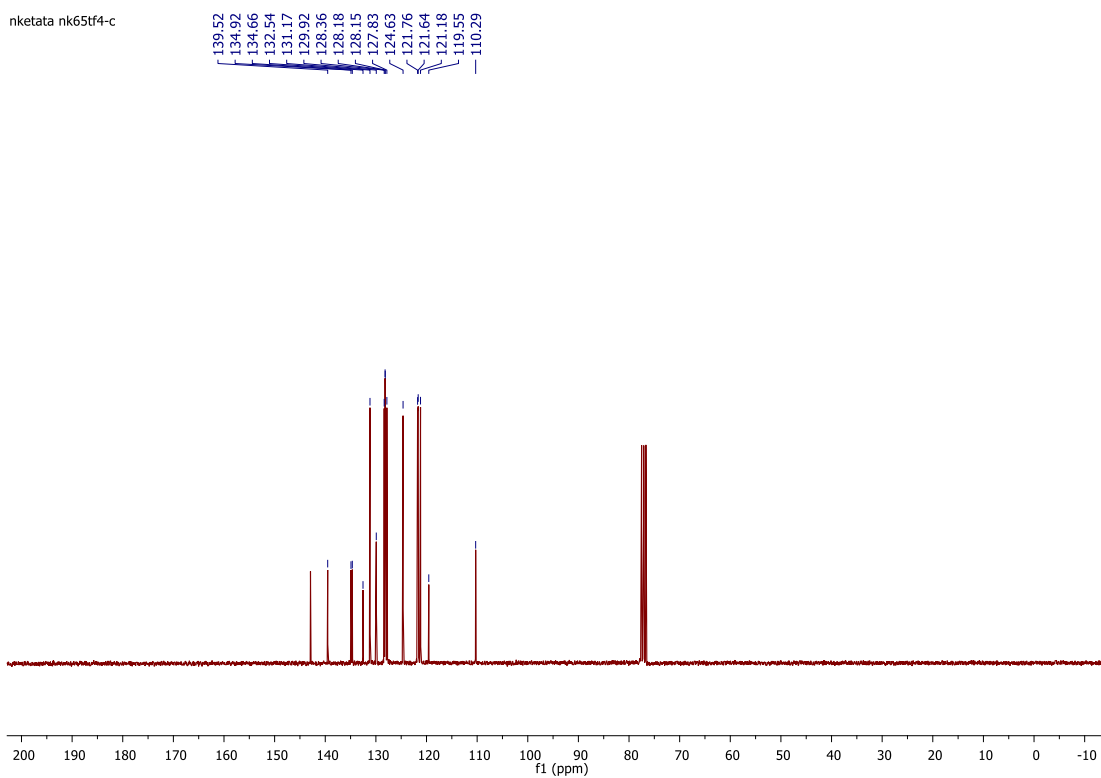

# 8-Nitrofluoranthene (24)

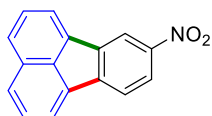

## <sup>1</sup>H NMR (400MHz, CDCl<sub>3</sub>)

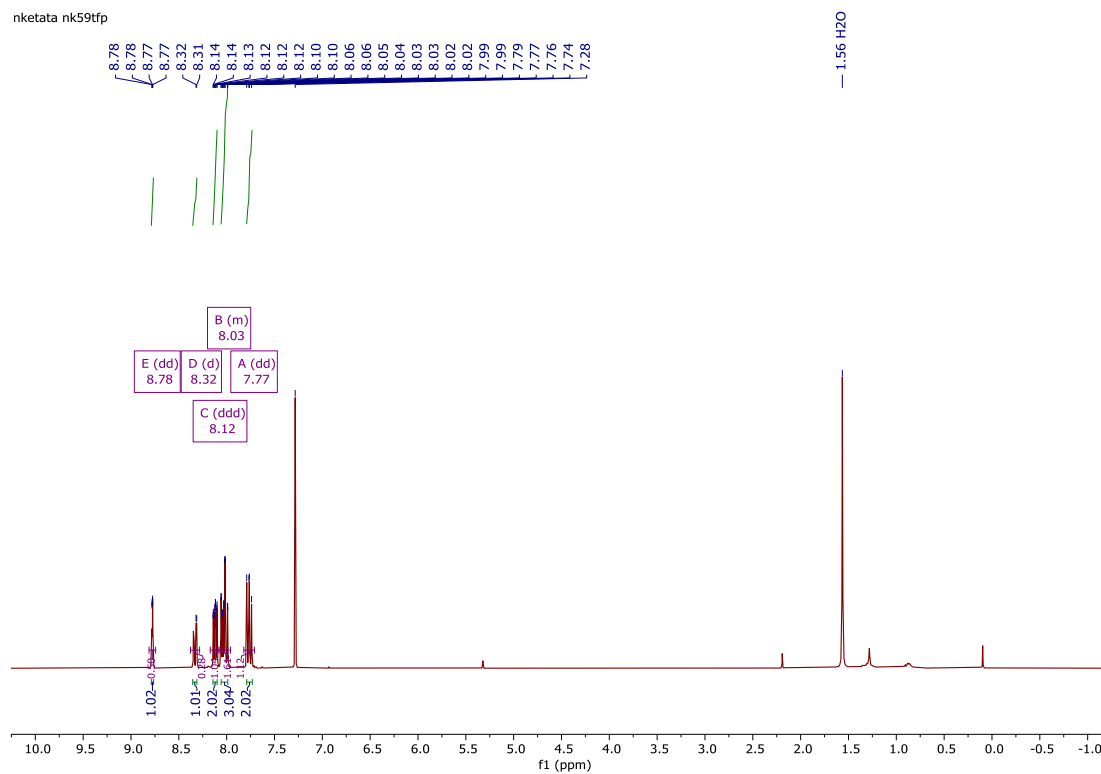

## <sup>13</sup>C NMR (100 MHz, CDCl<sub>3</sub>)

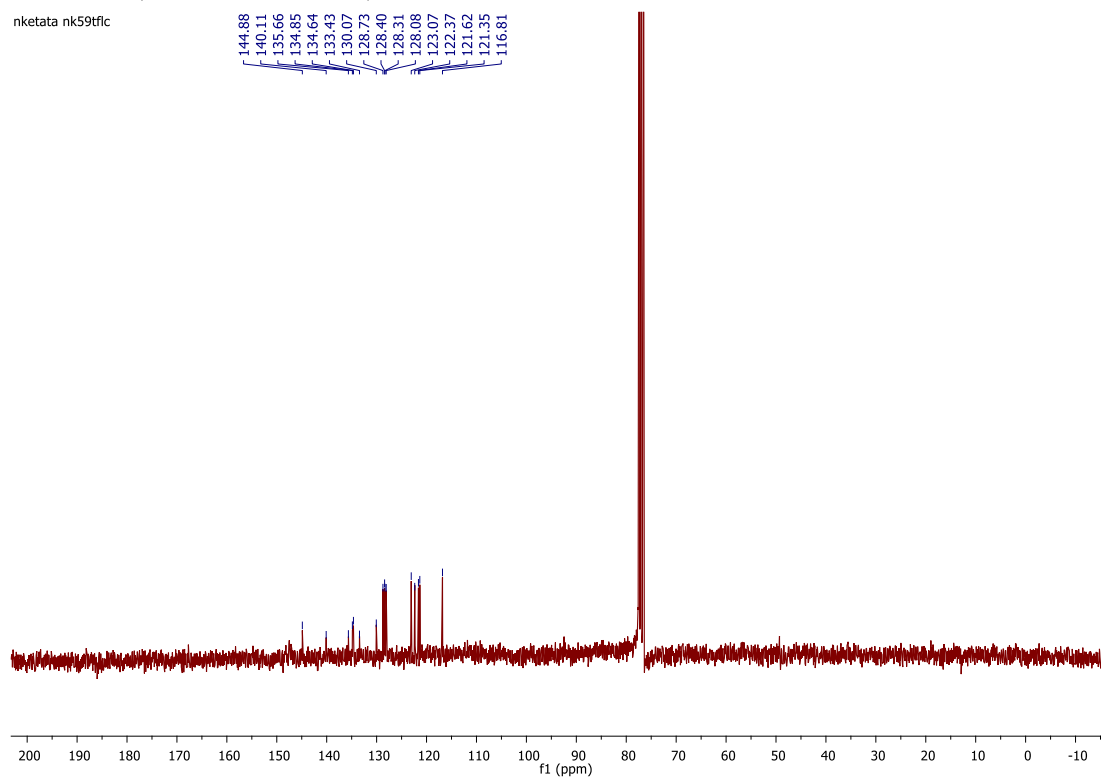

# 8,9-Difluorofluoranthene (25)

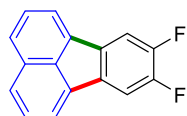

## <sup>1</sup>H NMR (400MHz, CDCl<sub>3</sub>)

nketata nk55tf13

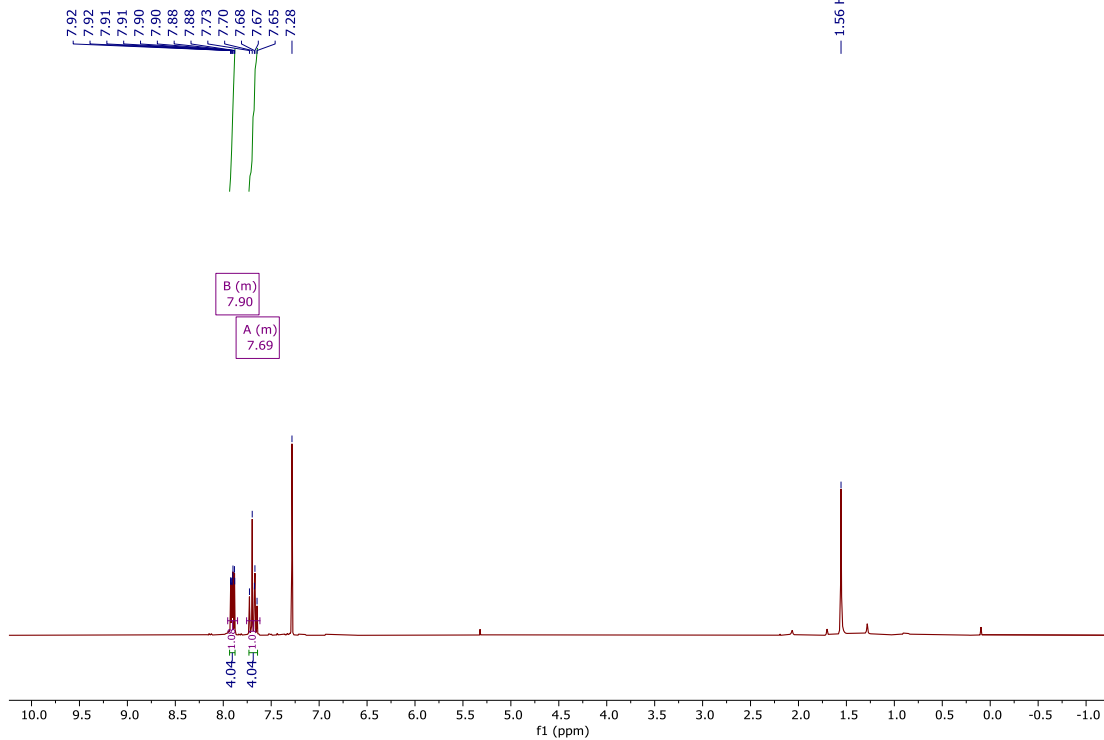

## <sup>19</sup>F NMR (376 MHz, CDCl<sub>3</sub>)

nketata nk55tf13

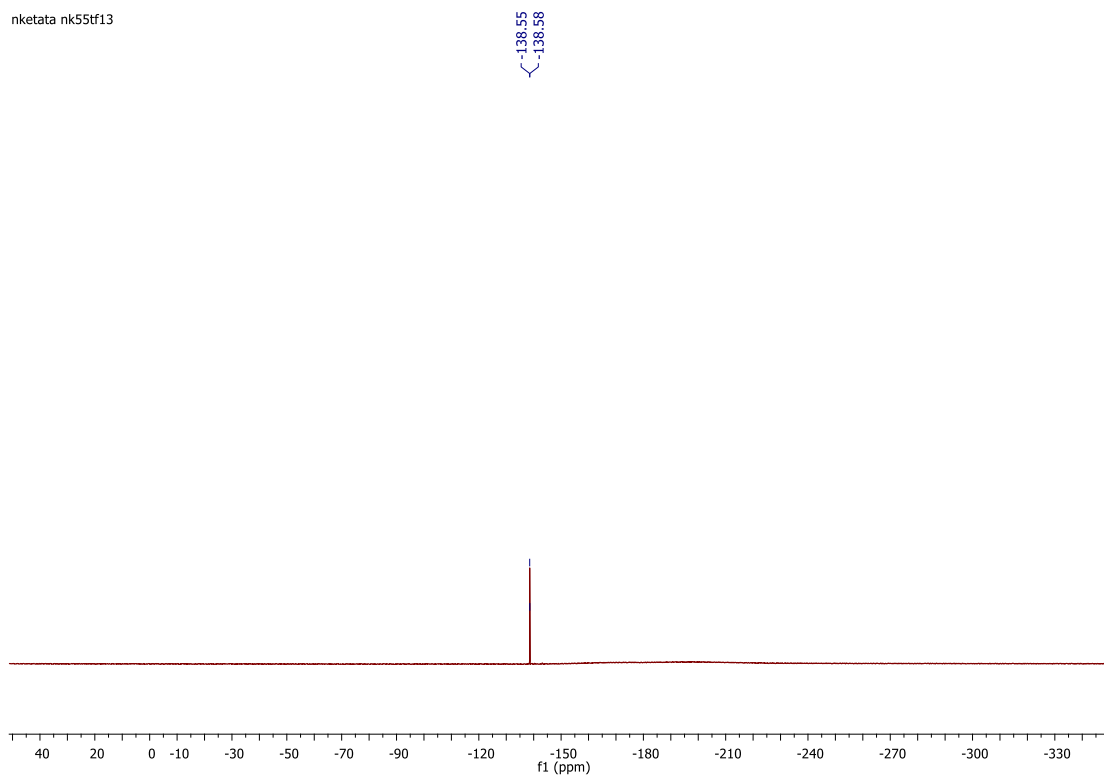



$^{13}\text{C}$  NMR (100 MHz,  $\text{CDCl}_3$ )

nketata nk55f

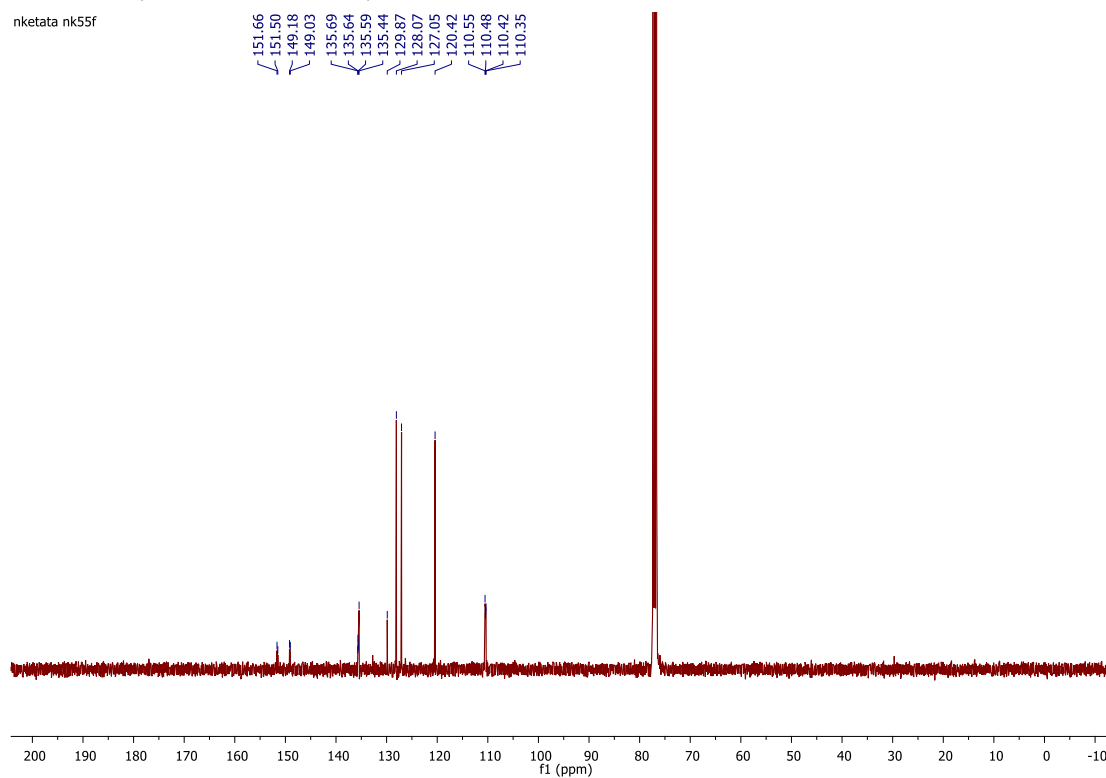

## 7,9-Difluorofluoranthene (26)

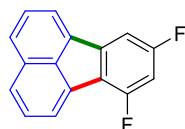

### $^1\text{H}$ NMR (400MHz, $\text{CDCl}_3$ )

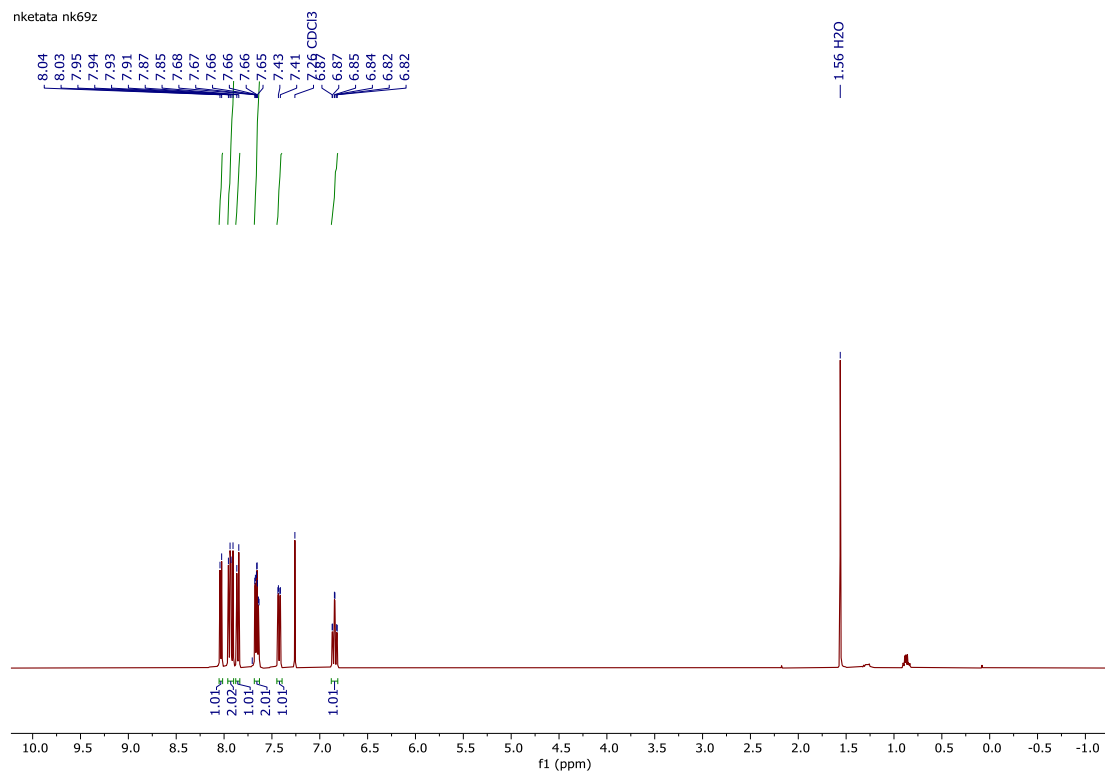

### $^{19}\text{F}$ NMR (376 MHz, $\text{CDCl}_3$ )

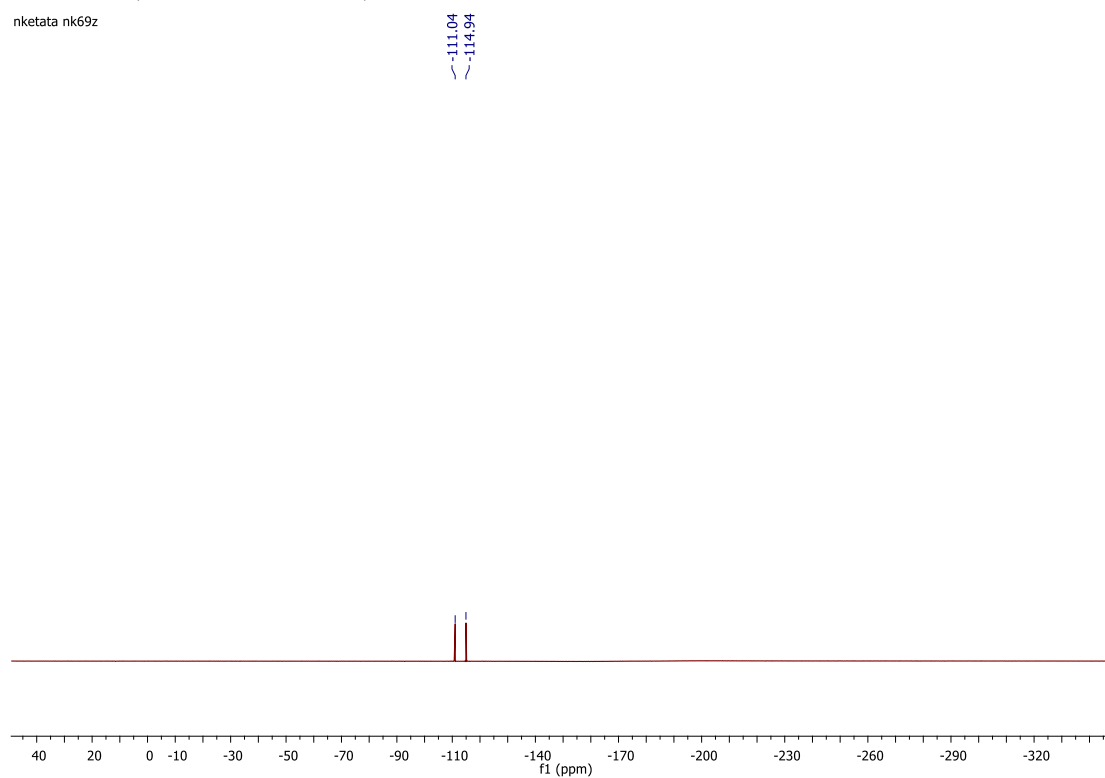

$^{13}\text{C}$  NMR (100 MHz,  $\text{CDCl}_3$ )

nketata nk69z

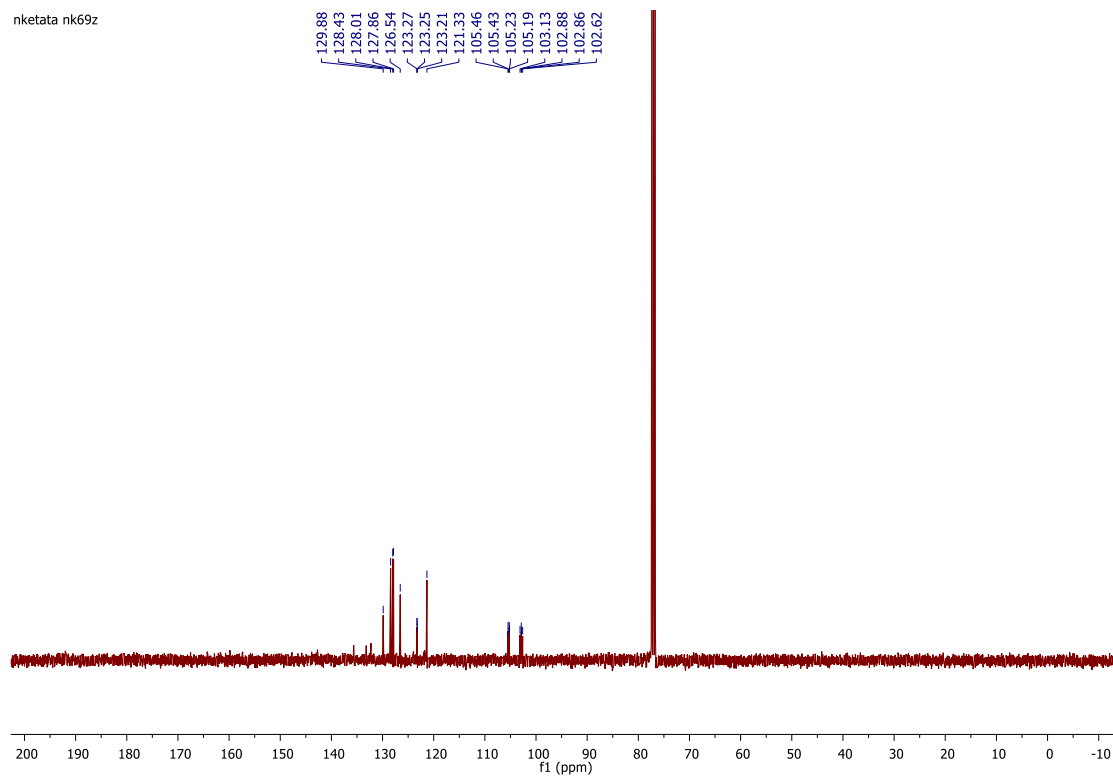

# Acenaphtho[1,2-c]pyridine (27)

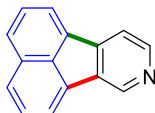

## <sup>1</sup>H NMR (400MHz, CDCl<sub>3</sub>)

nketata nk61tf

|      |      |      |      |      |      |      |      |      |      |      |      |      |      |      |      |      |      |      |      |
|------|------|------|------|------|------|------|------|------|------|------|------|------|------|------|------|------|------|------|------|
| 9.16 | 9.16 | 8.66 | 8.64 | 8.04 | 8.02 | 7.99 | 7.96 | 7.91 | 7.88 | 7.78 | 7.77 | 7.76 | 7.71 | 7.69 | 7.68 | 7.67 | 7.66 | 7.64 | 7.28 |
|------|------|------|------|------|------|------|------|------|------|------|------|------|------|------|------|------|------|------|------|

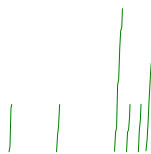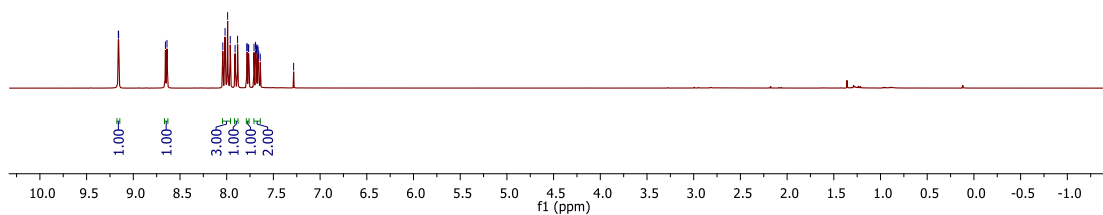

## <sup>13</sup>C NMR (100 MHz, CDCl<sub>3</sub>)

nketata nk61tf

|        |        |        |        |        |        |        |        |        |        |        |        |        |        |        |
|--------|--------|--------|--------|--------|--------|--------|--------|--------|--------|--------|--------|--------|--------|--------|
| 148.62 | 146.10 | 142.86 | 134.55 | 134.53 | 134.14 | 132.26 | 130.06 | 129.08 | 128.27 | 128.02 | 127.36 | 122.43 | 121.34 | 116.36 |
|--------|--------|--------|--------|--------|--------|--------|--------|--------|--------|--------|--------|--------|--------|--------|

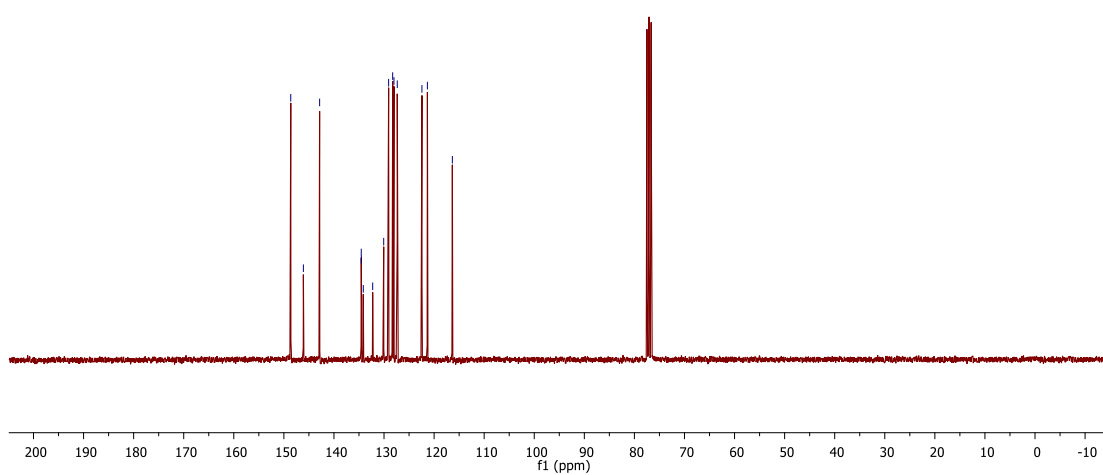

### 3-Methyl-9-phenylphenanthrene (28)

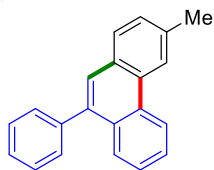

### $^1\text{H NMR}$ (400MHz, $\text{CDCl}_3$ )

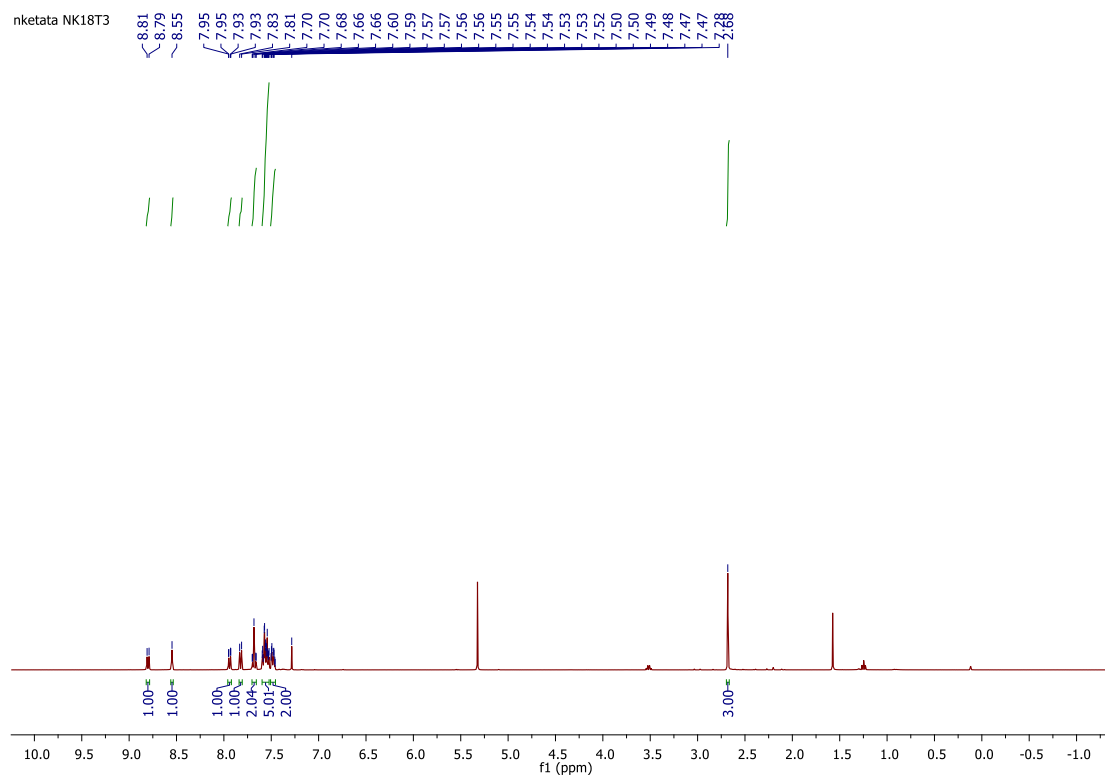

### $^{13}\text{C NMR}$ (100 MHz, $\text{CDCl}_3$ )

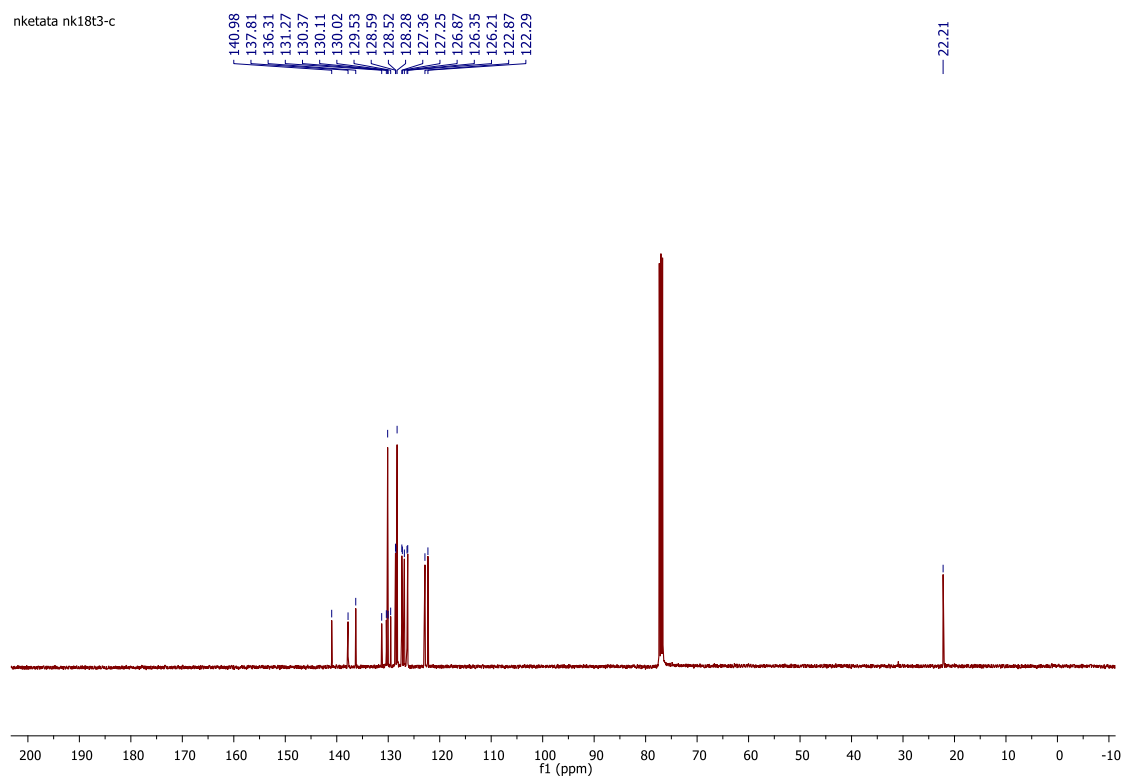

## 2-Methyl-9-phenylphenanthrene (29)

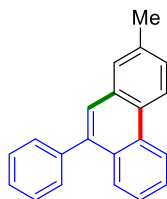

### $^1\text{H NMR}$ (400MHz, $\text{CDCl}_3$ )

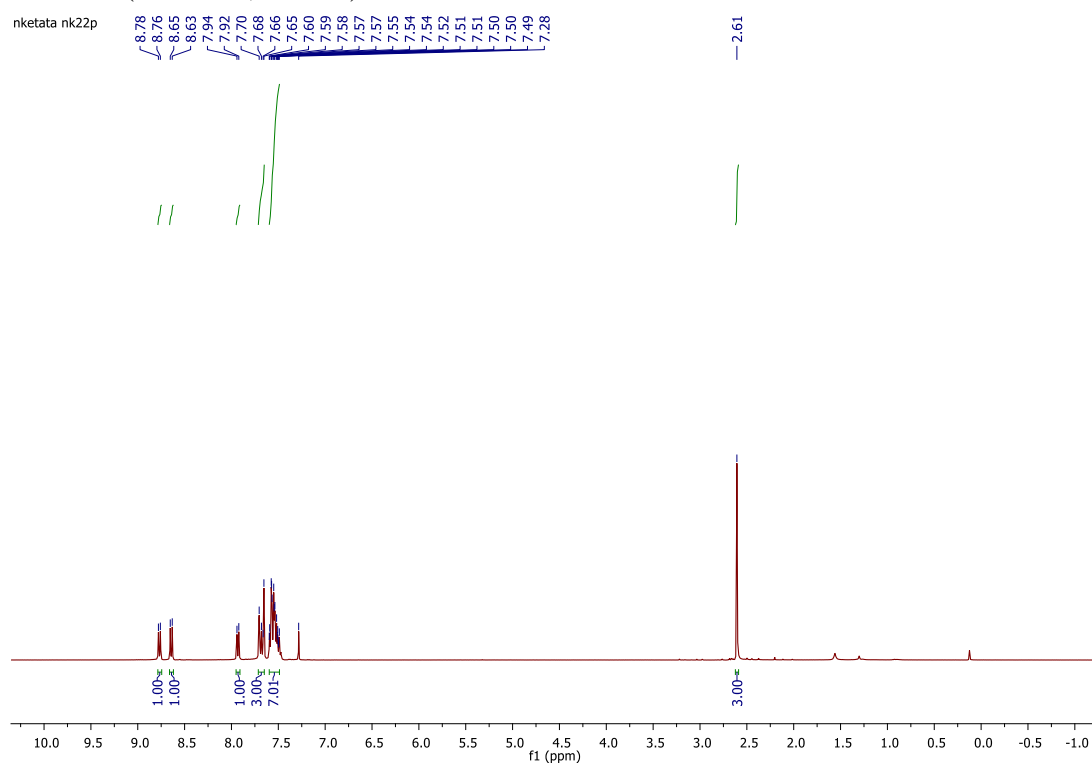

### $^{13}\text{C NMR}$ (100 MHz, $\text{CDCl}_3$ )

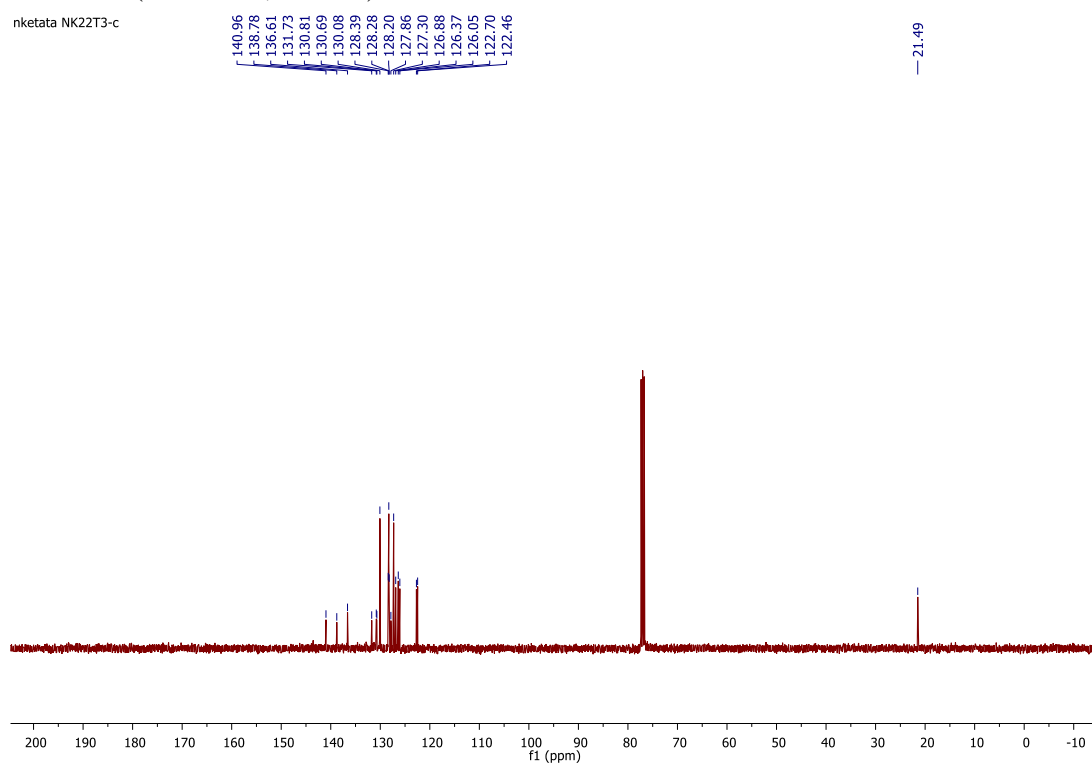

## 2,3-Dimethyl-9-phenylphenanthrene (30)

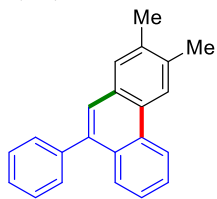

### $^1\text{H}$ NMR (400MHz, $\text{CDCl}_3$ )

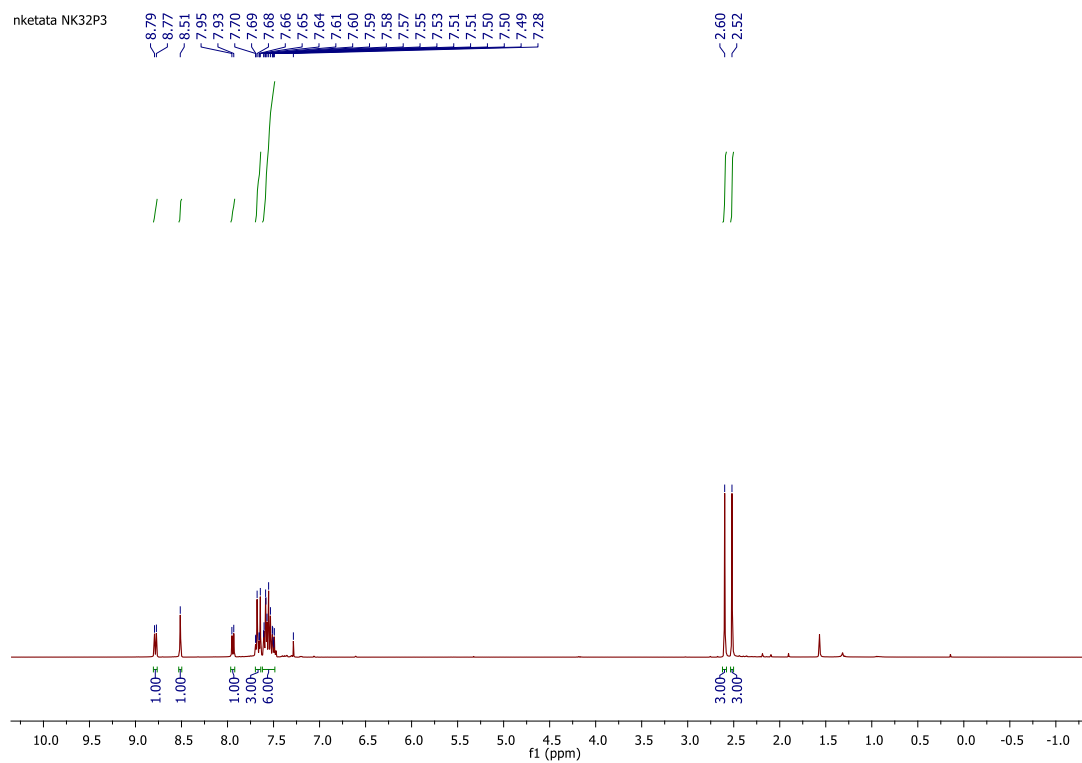

### $^{13}\text{C}$ NMR (100 MHz, $\text{CDCl}_3$ )

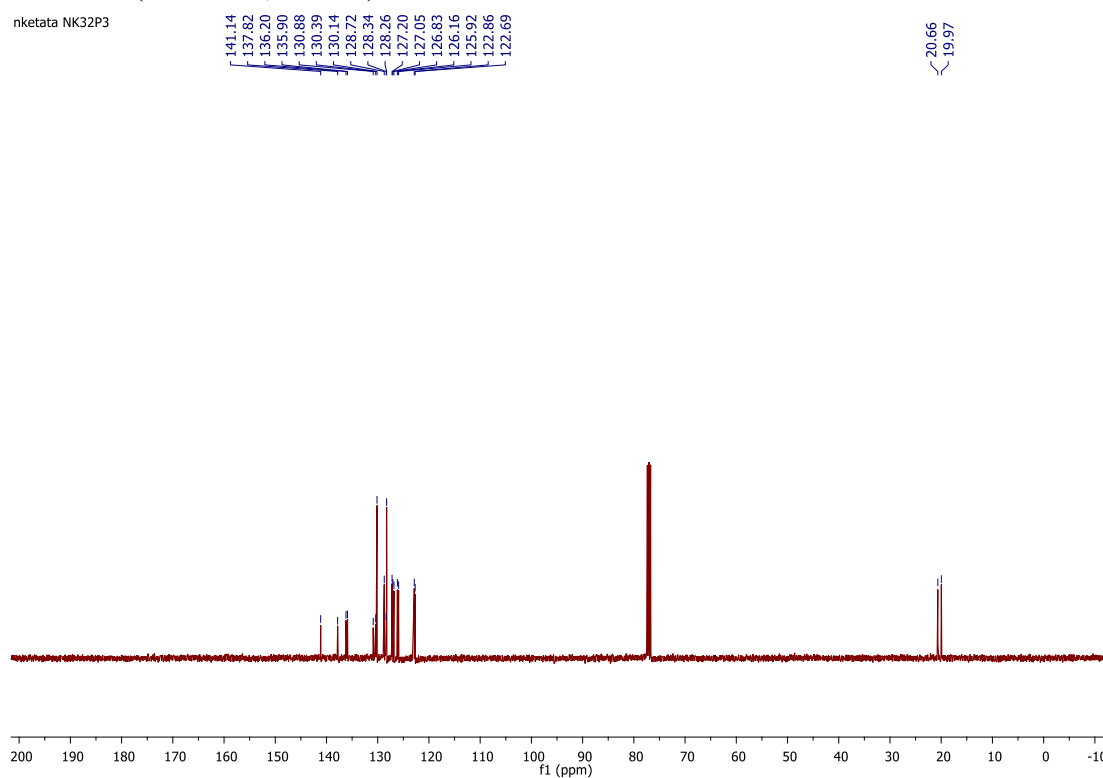

Supplement: Additional file 2 [file 1860-5397-20-37-S2.pdf]
